# Supplementary material
Source: PubMed Central journal article supplement (PMC6956531)

Anderson EM, Sychantha D, Brewer D, Clarke AJ, Geddes-McAlister J and Khursigara CM

Peptidoglycomics: Examining compositional changes in peptidoglycan  
between biofilm- and planktonic-derived *Pseudomonas aeruginosa*

Figure S2. Example annotated MS and MS/MS spectra of muuropeptide identification.

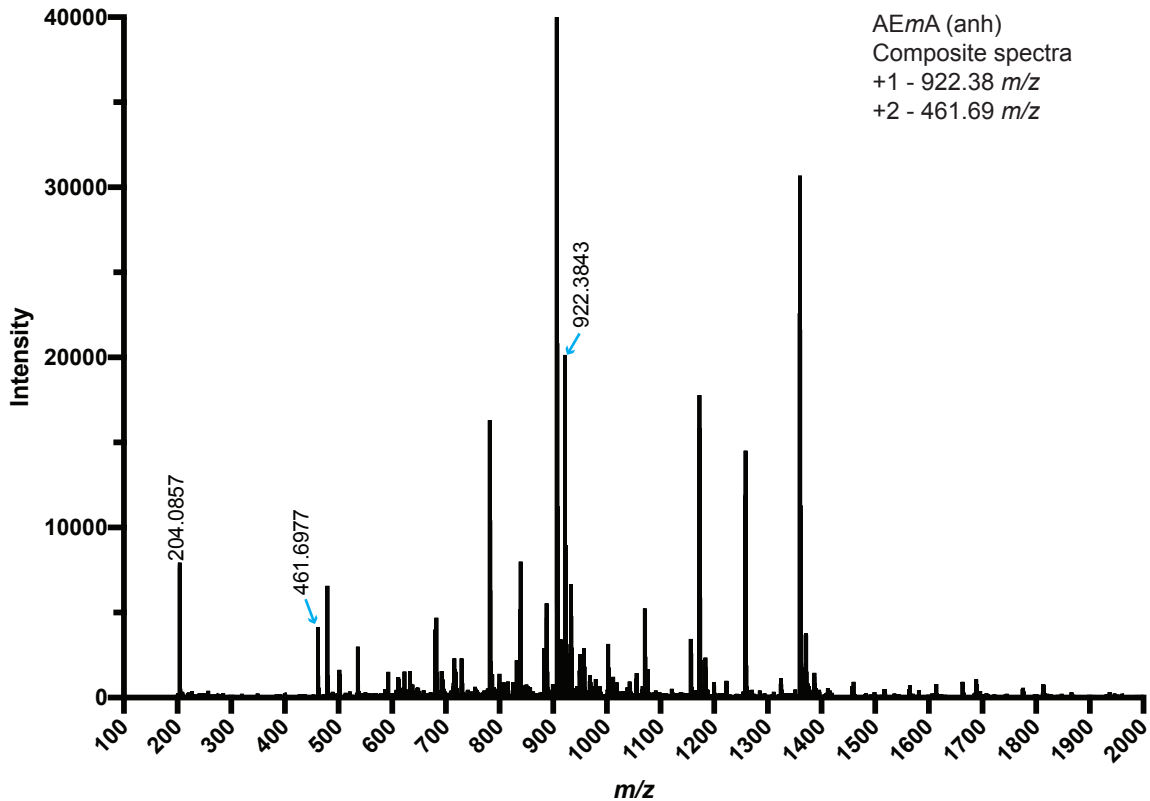

MS/MS - 461.6959 (+2) *m/z*

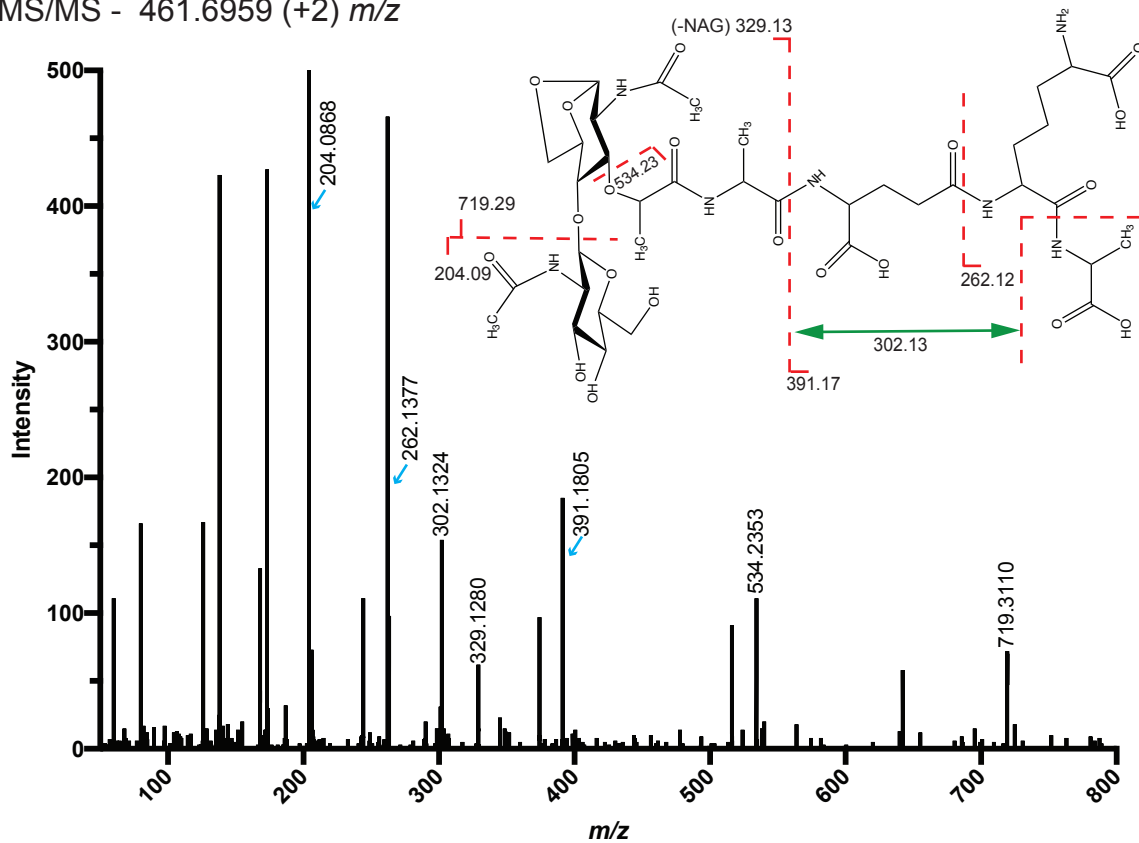

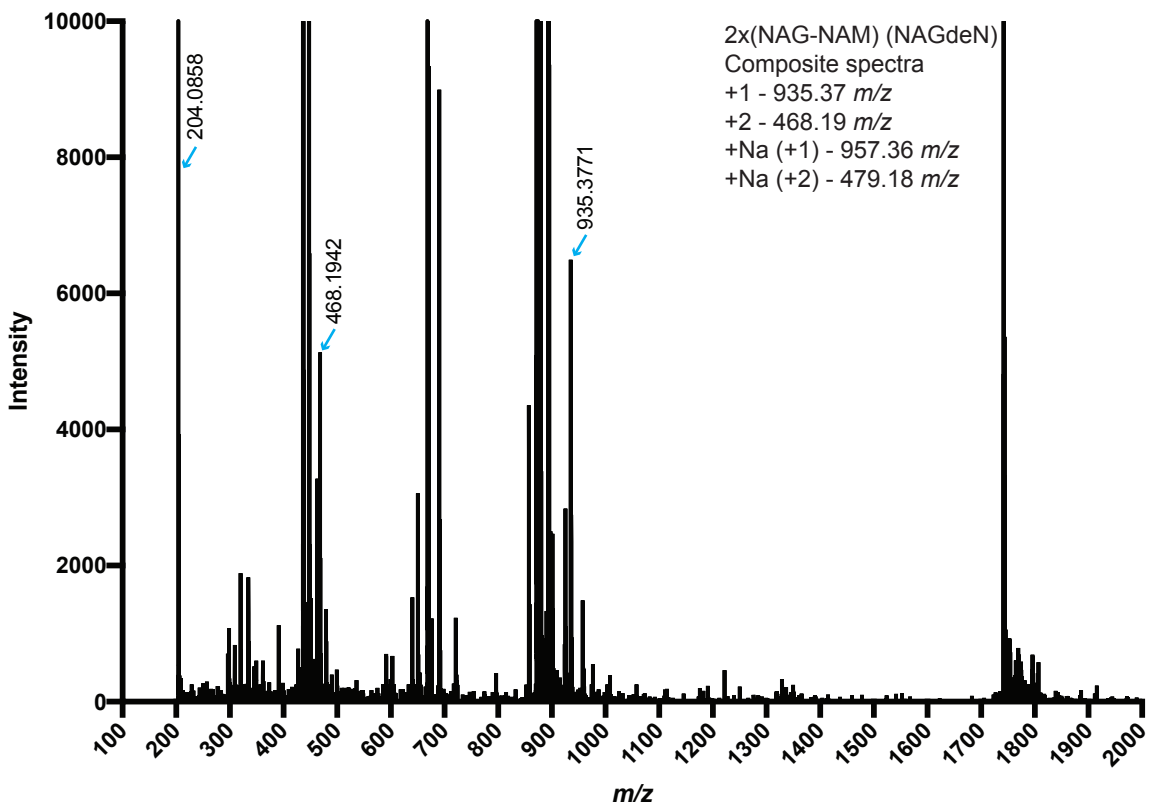

MS/MS - 468.1923 (+2) *m/z*

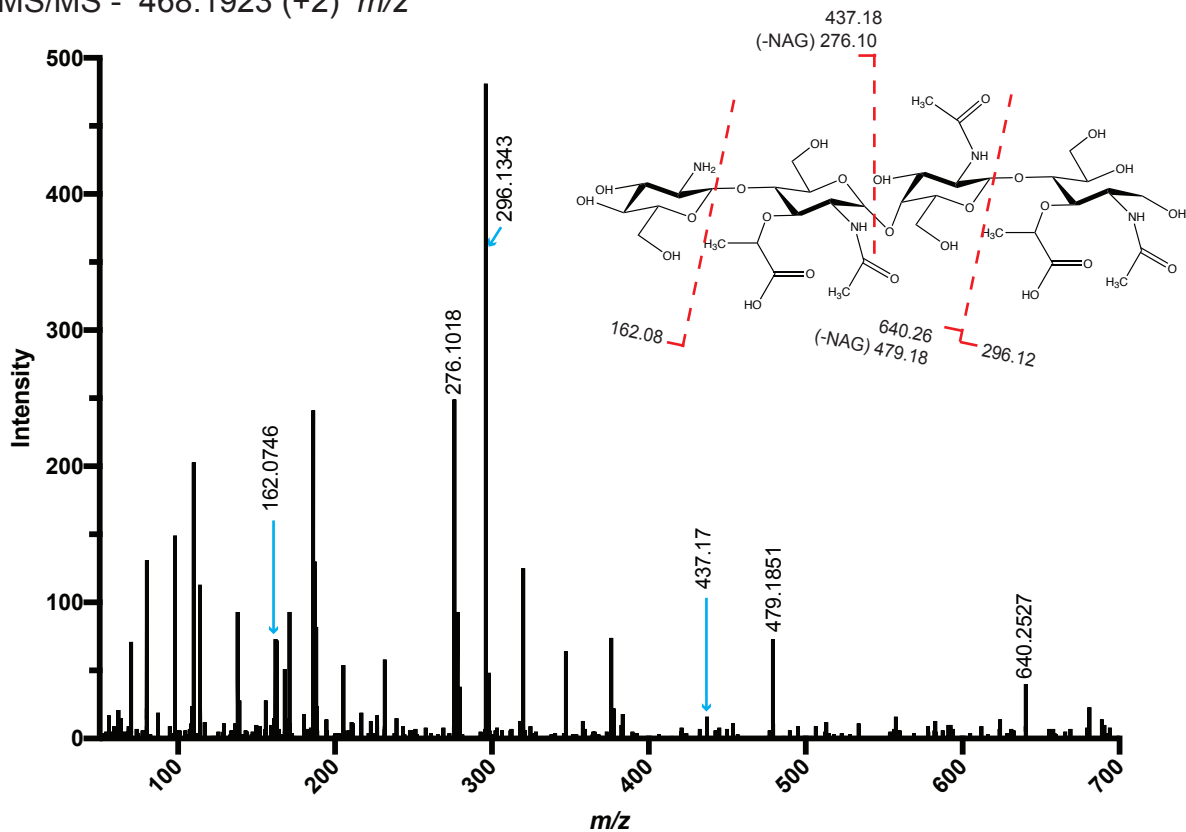

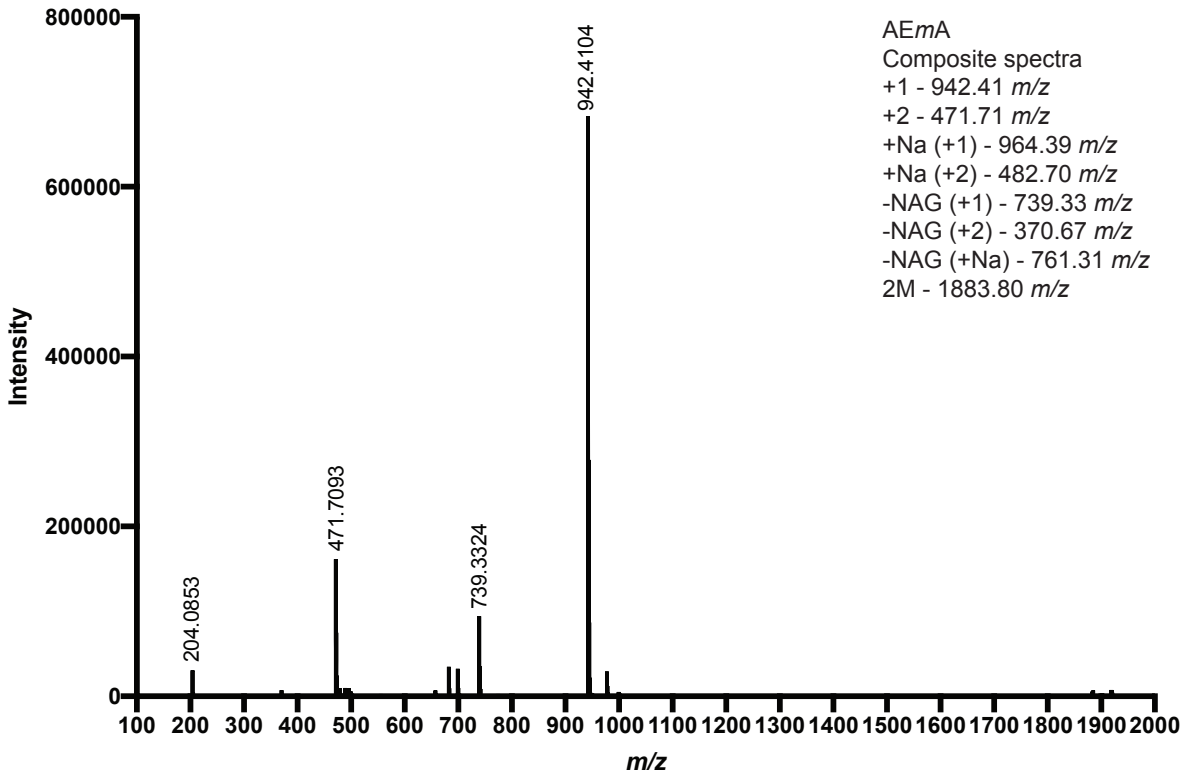

MS/MS - (+2) 471.7093 *m/z*

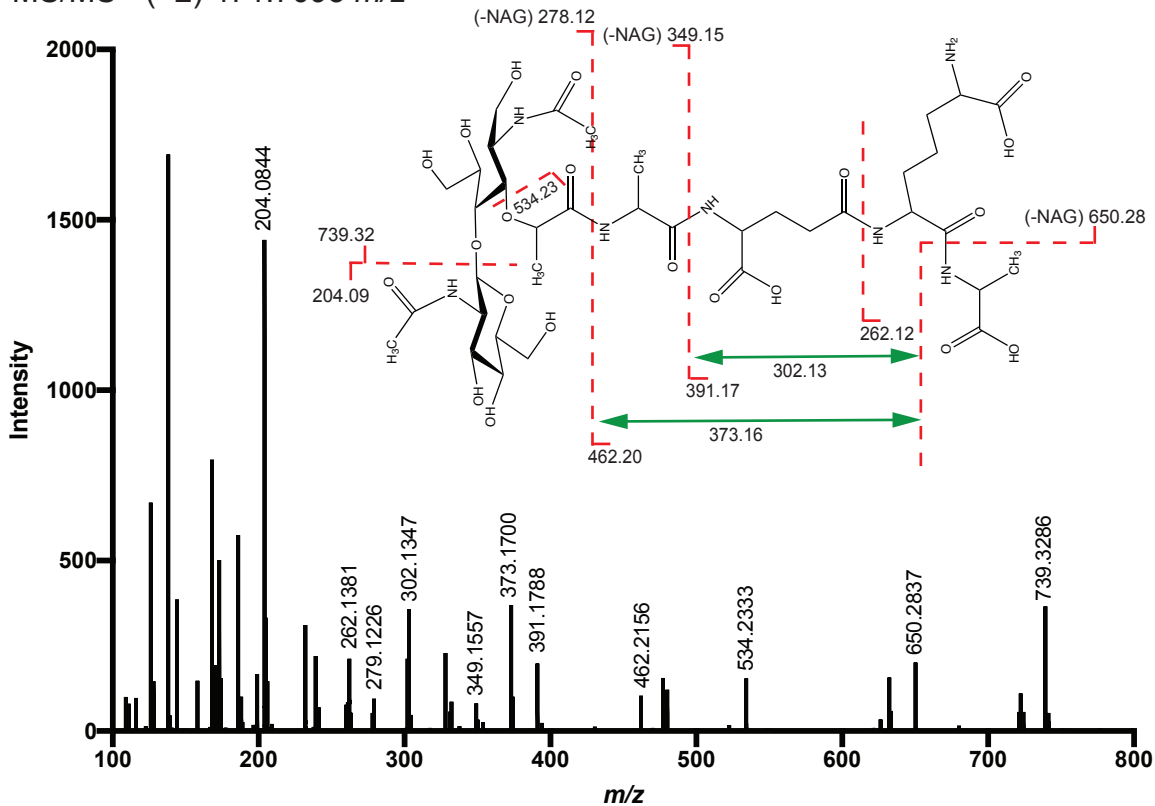

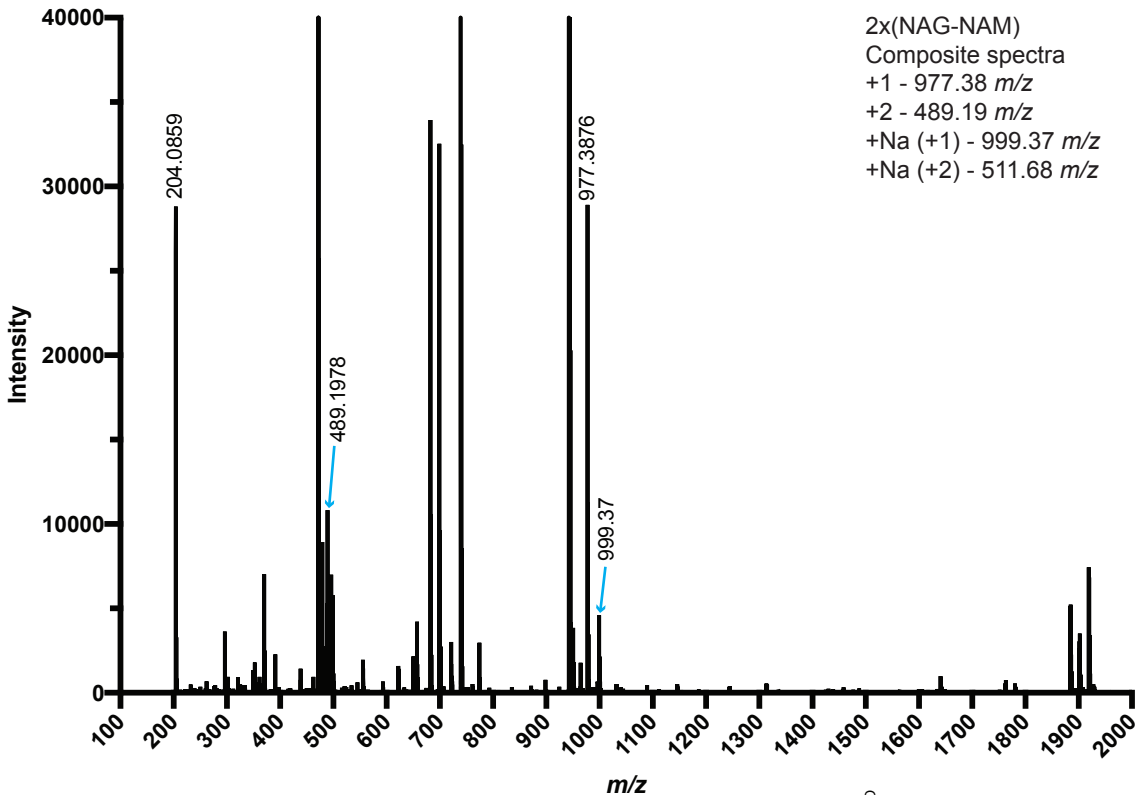

MS/MS - (+2) 489.1974 m/z

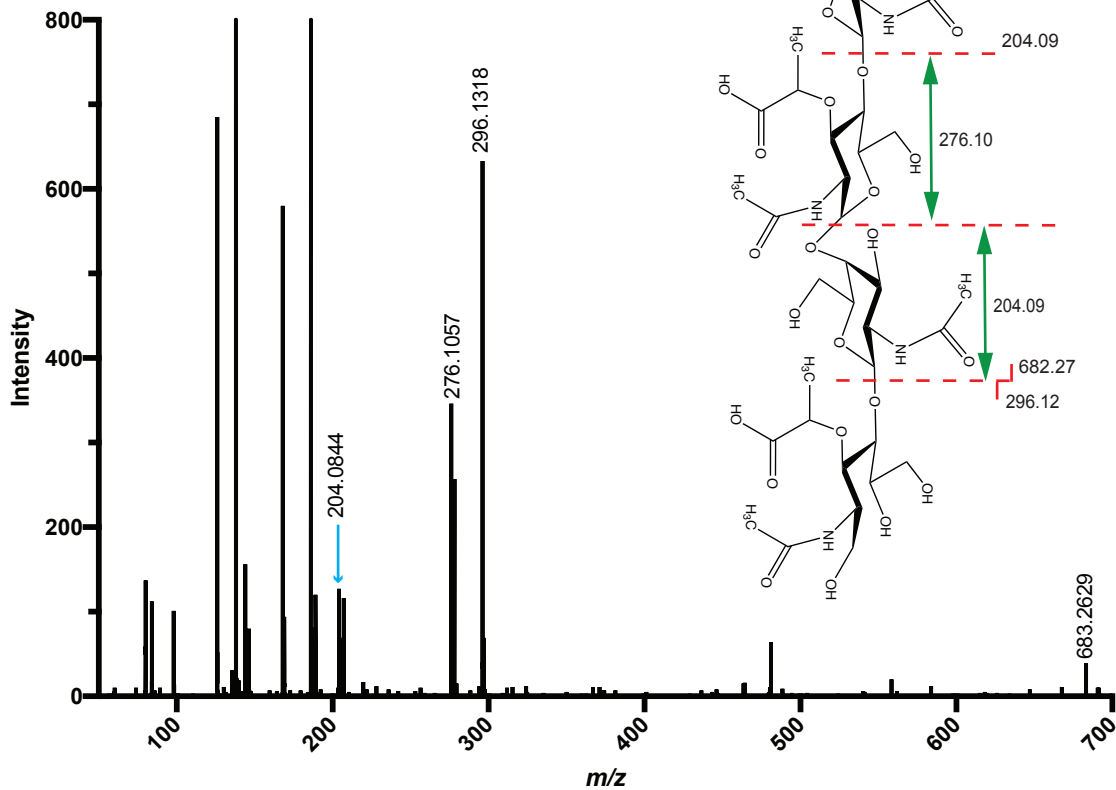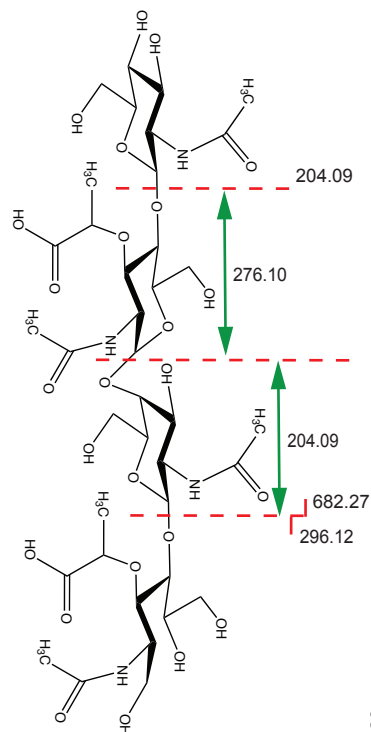

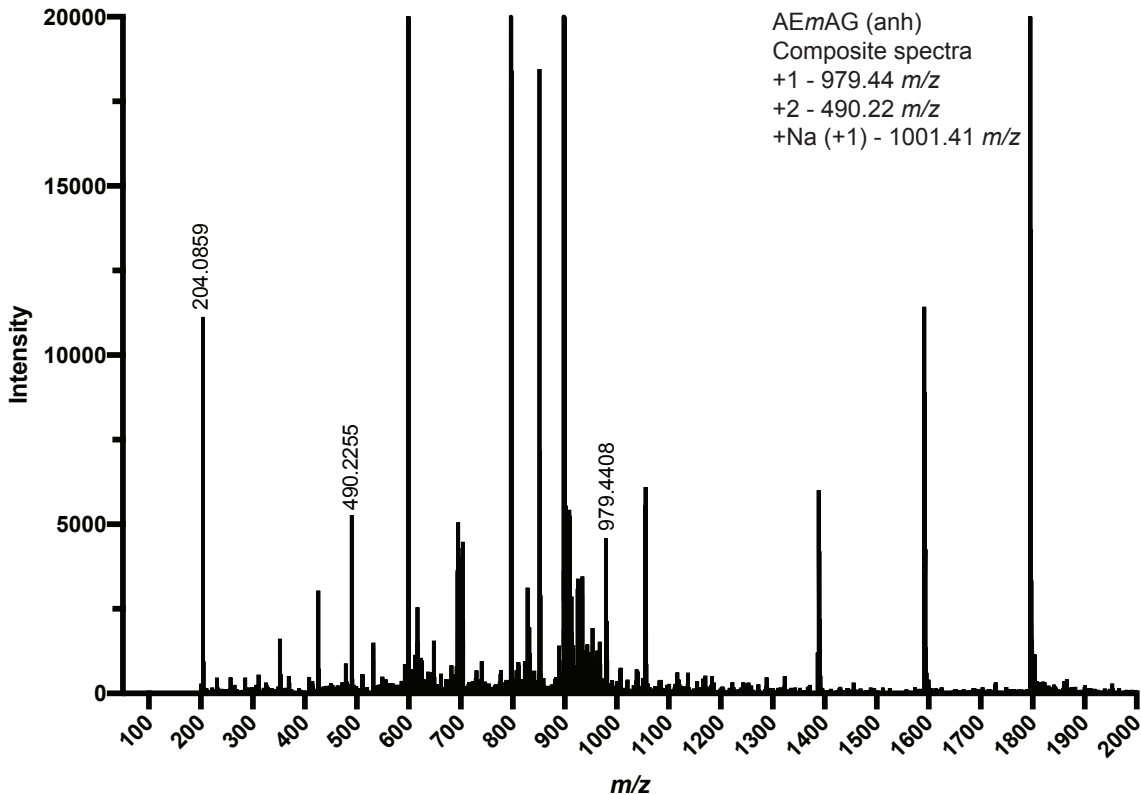

MS/MS - 490.2249 (+2)  $m/z$

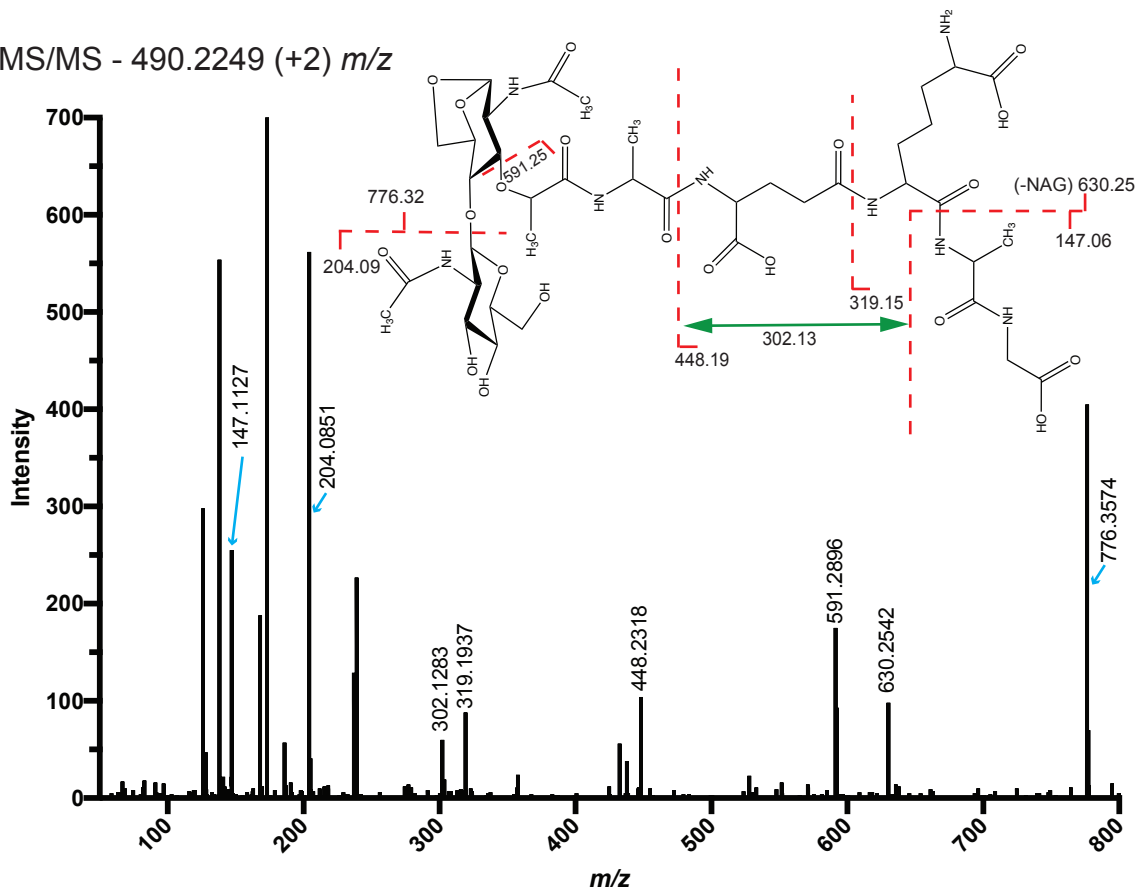

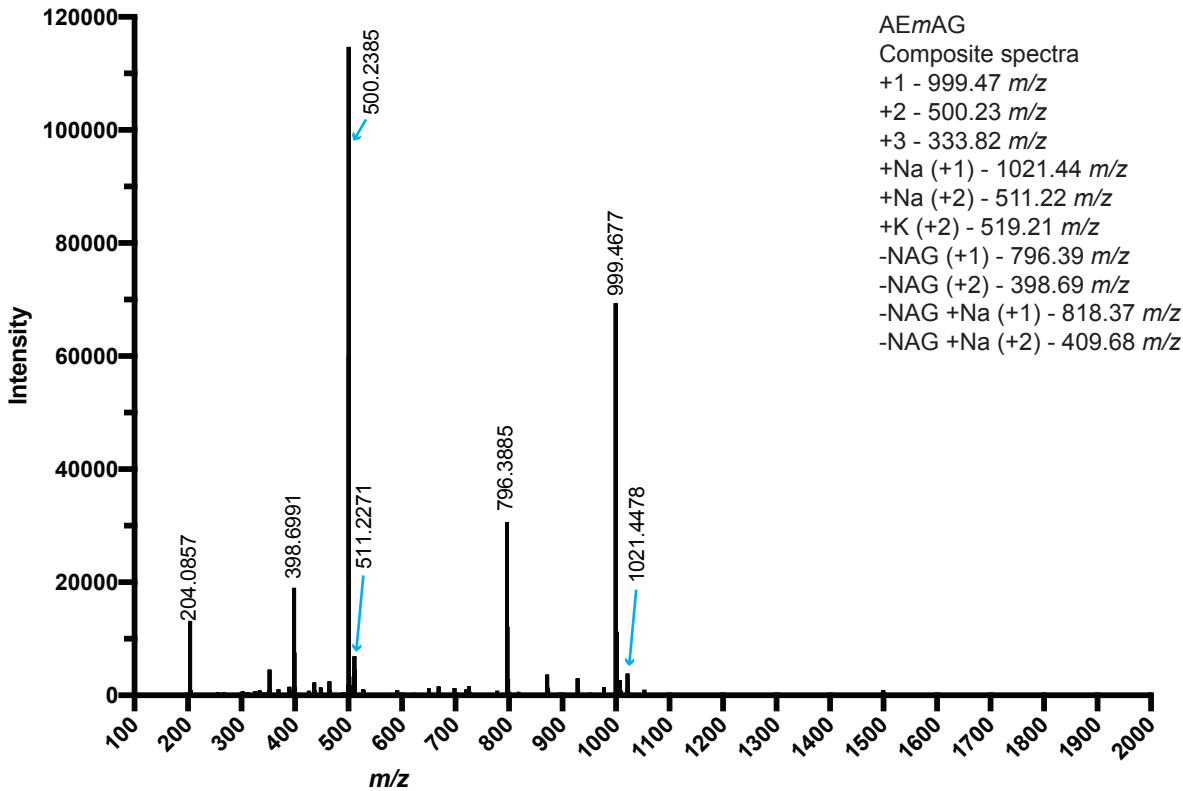

MS/MS - 500.2362 (+2) m/z

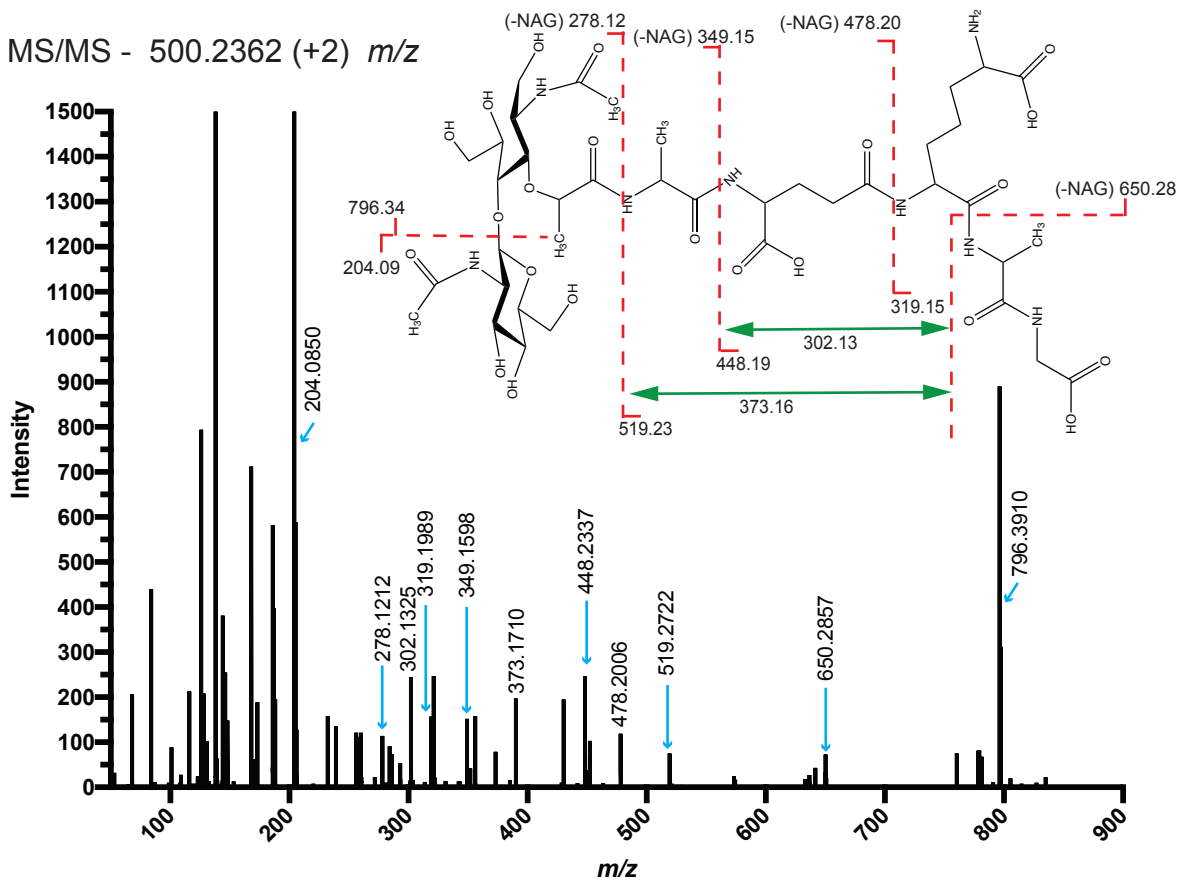

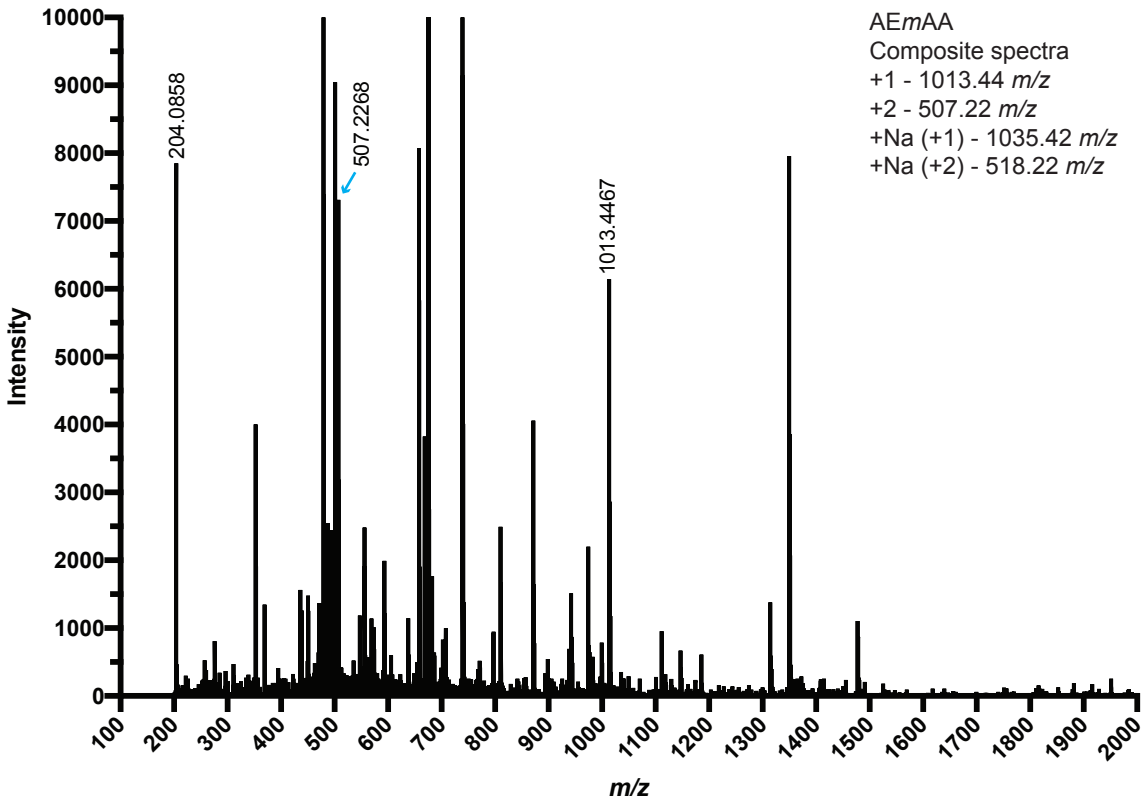

MS/MS - 507.2266 (+2) m/z

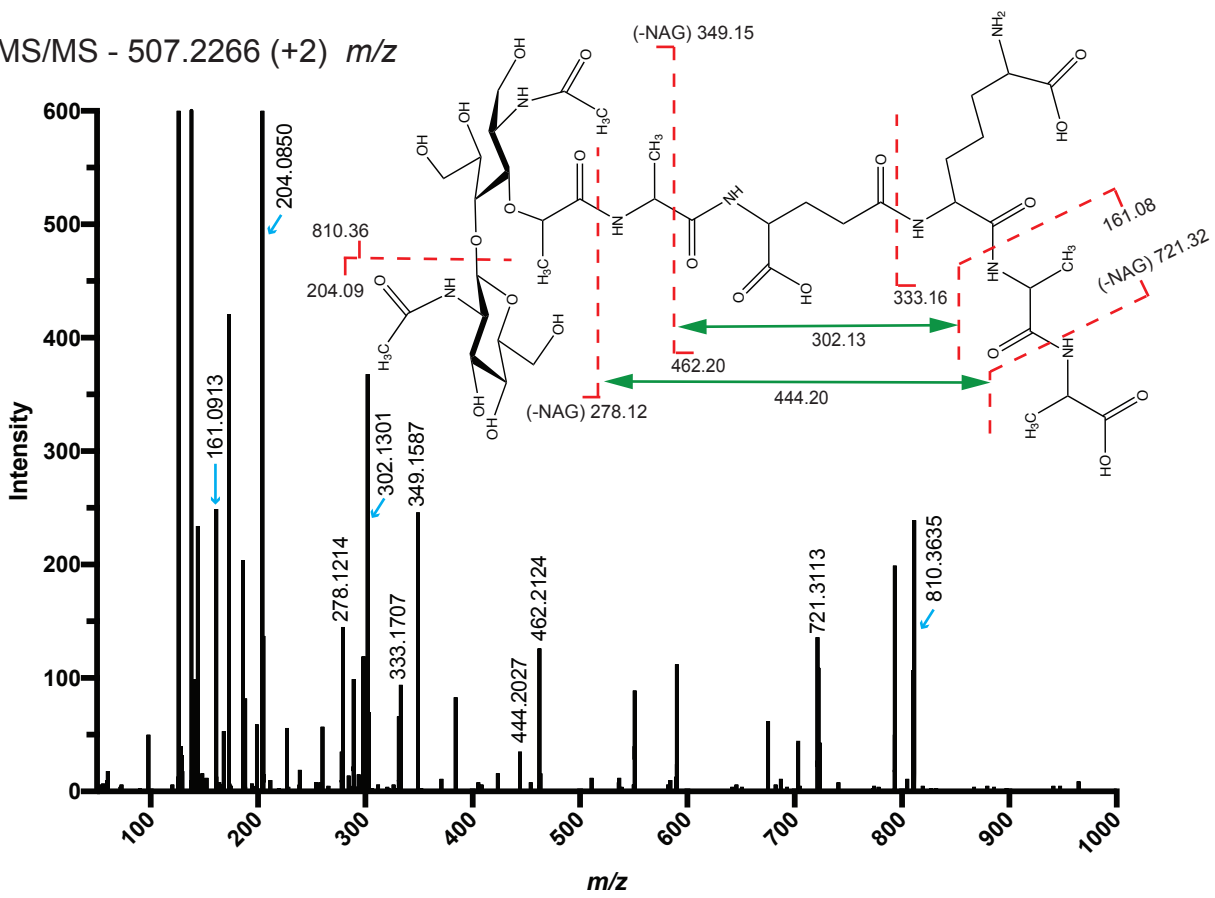



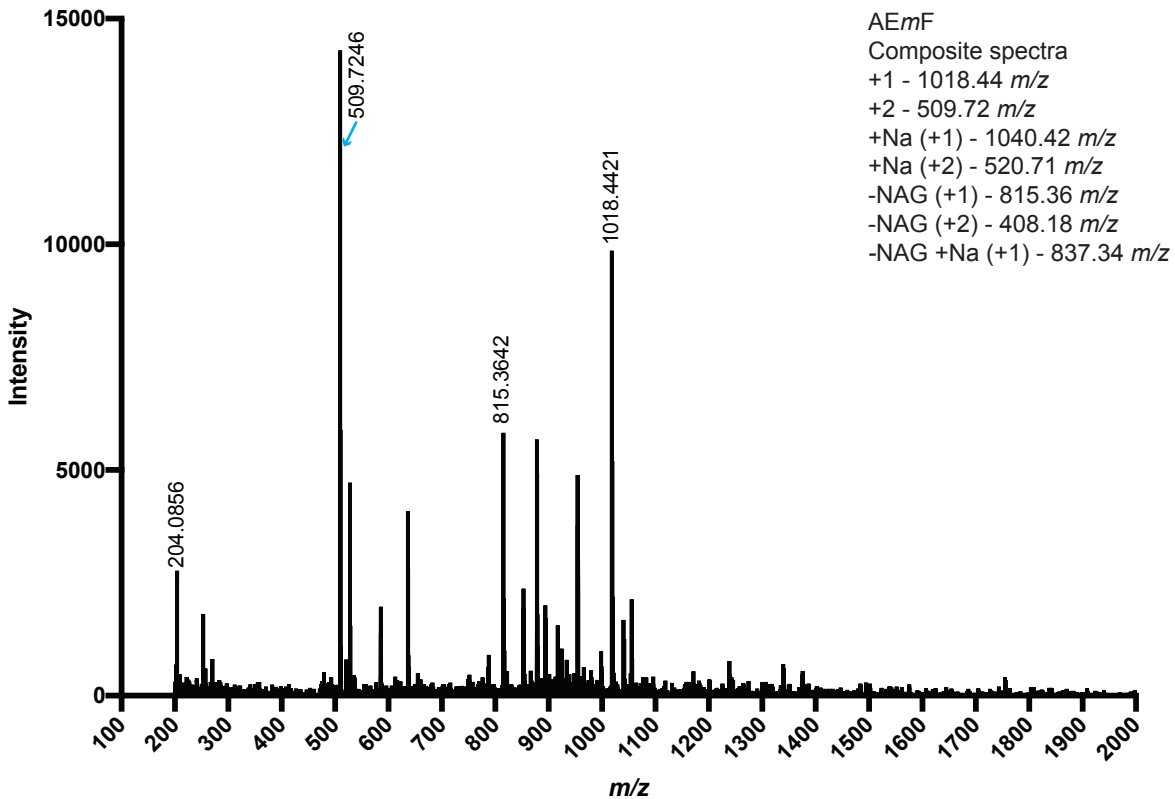

MS/MS - (+2) 509.7246 *m/z*

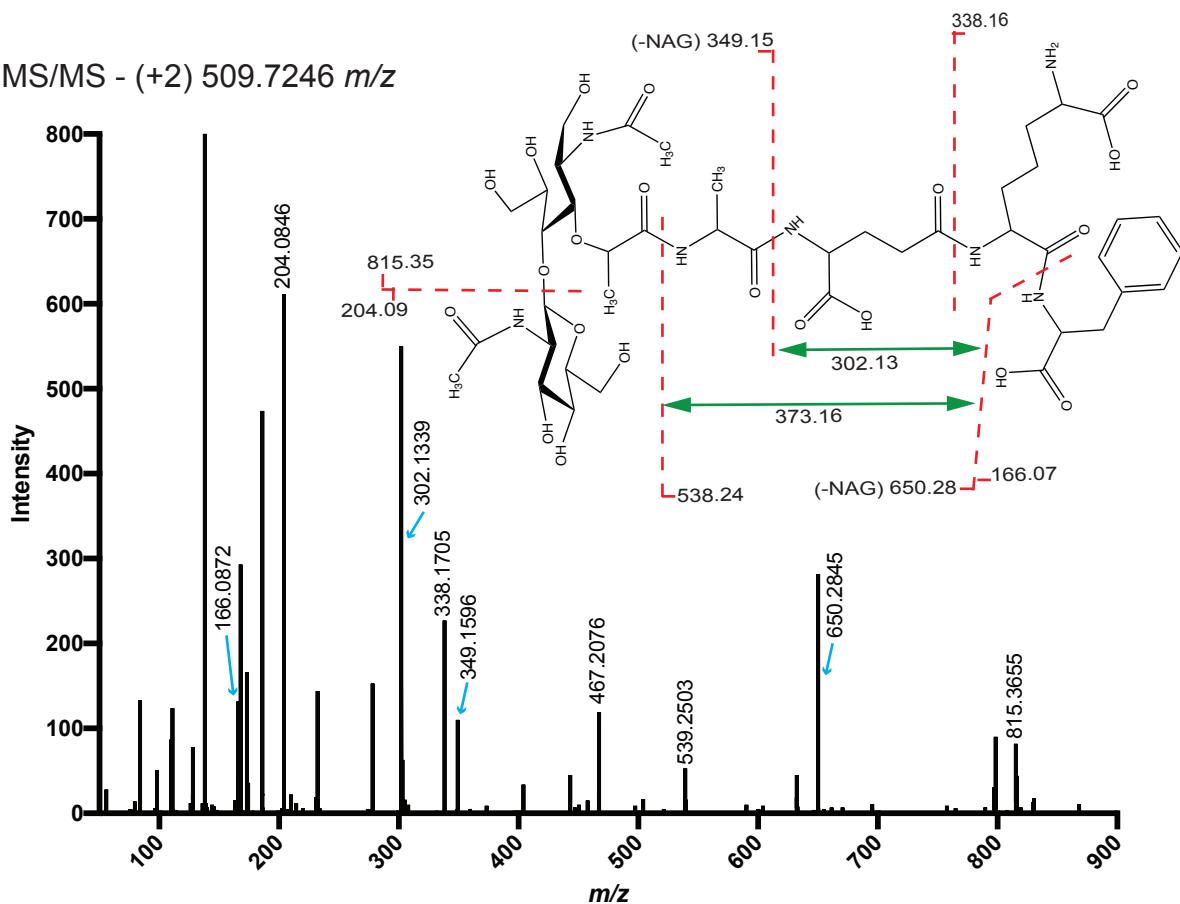

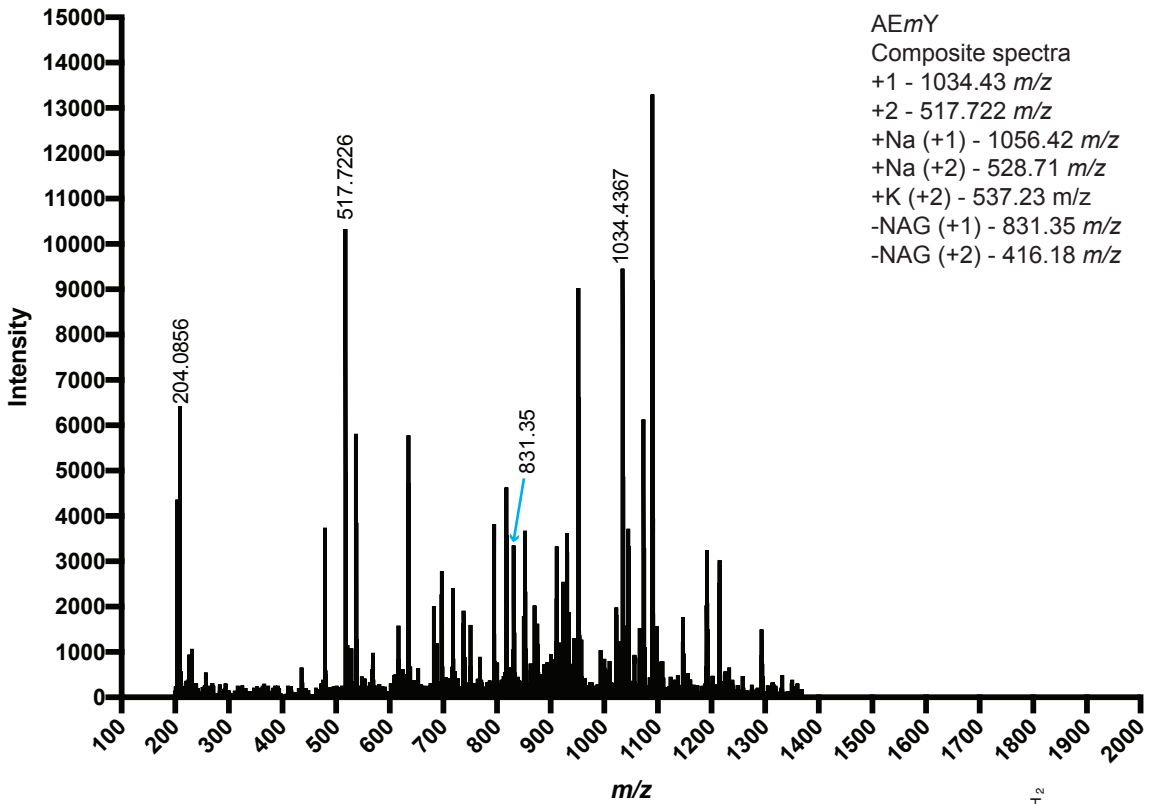

MS/MS - (+2) 517.7226 m/z

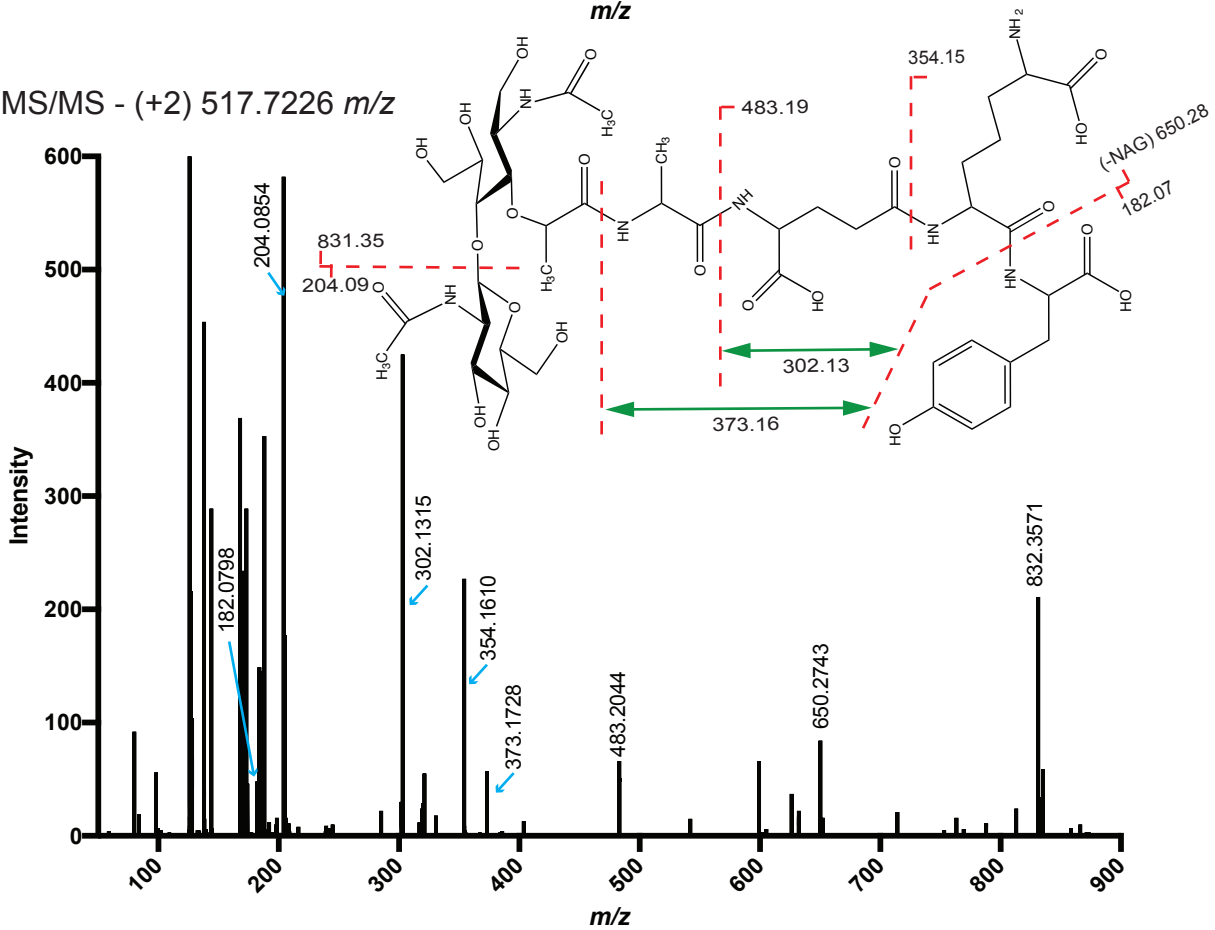

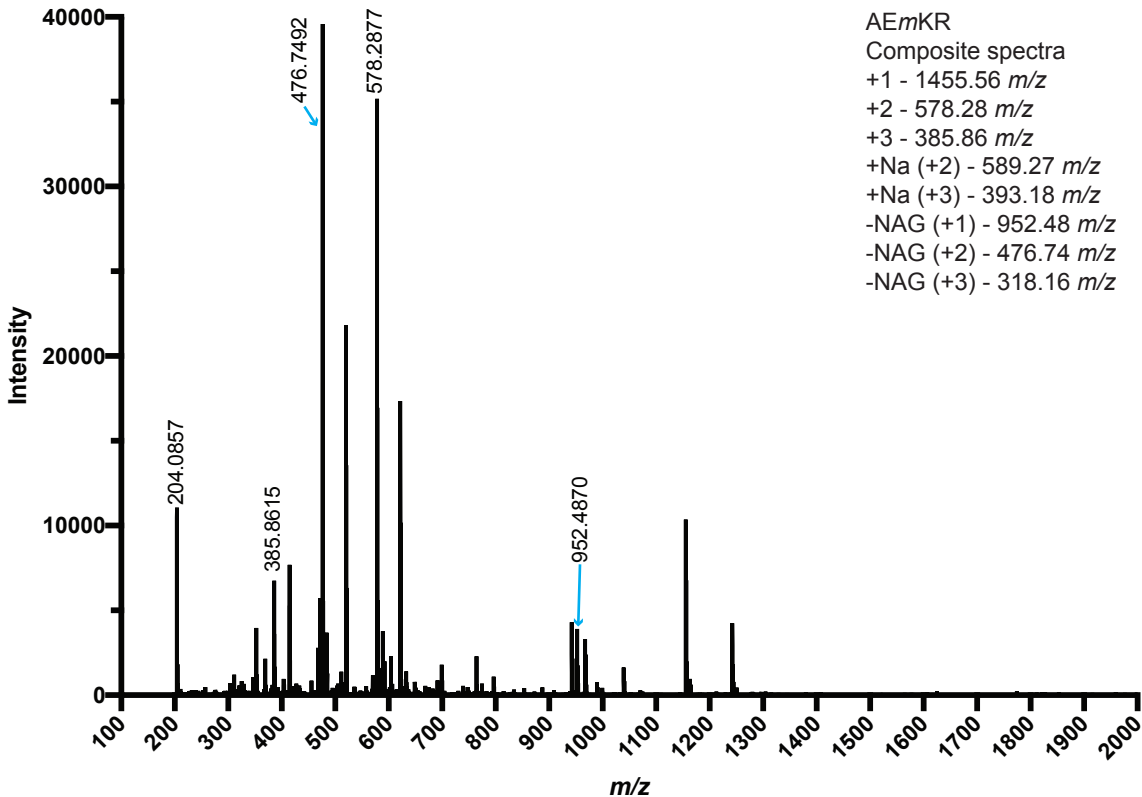

MS/MS - (+2) 578.2880 *m/z*

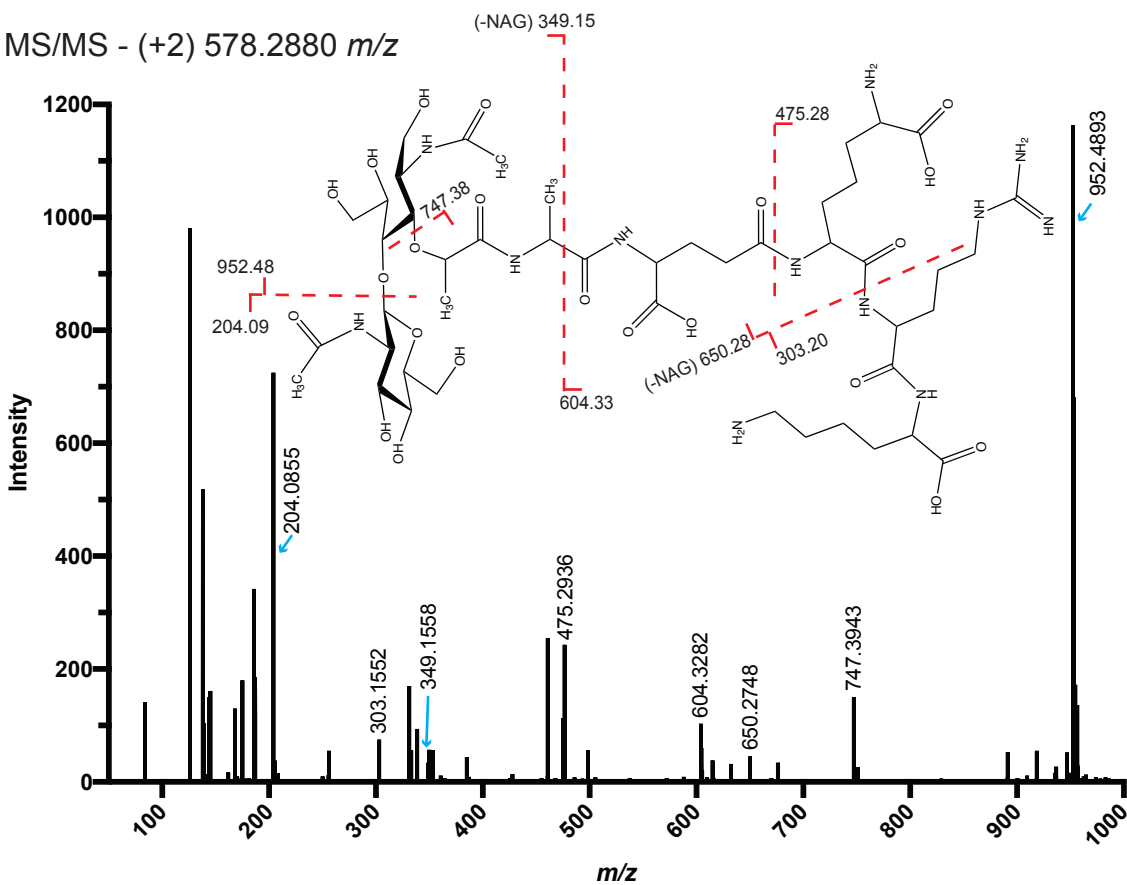

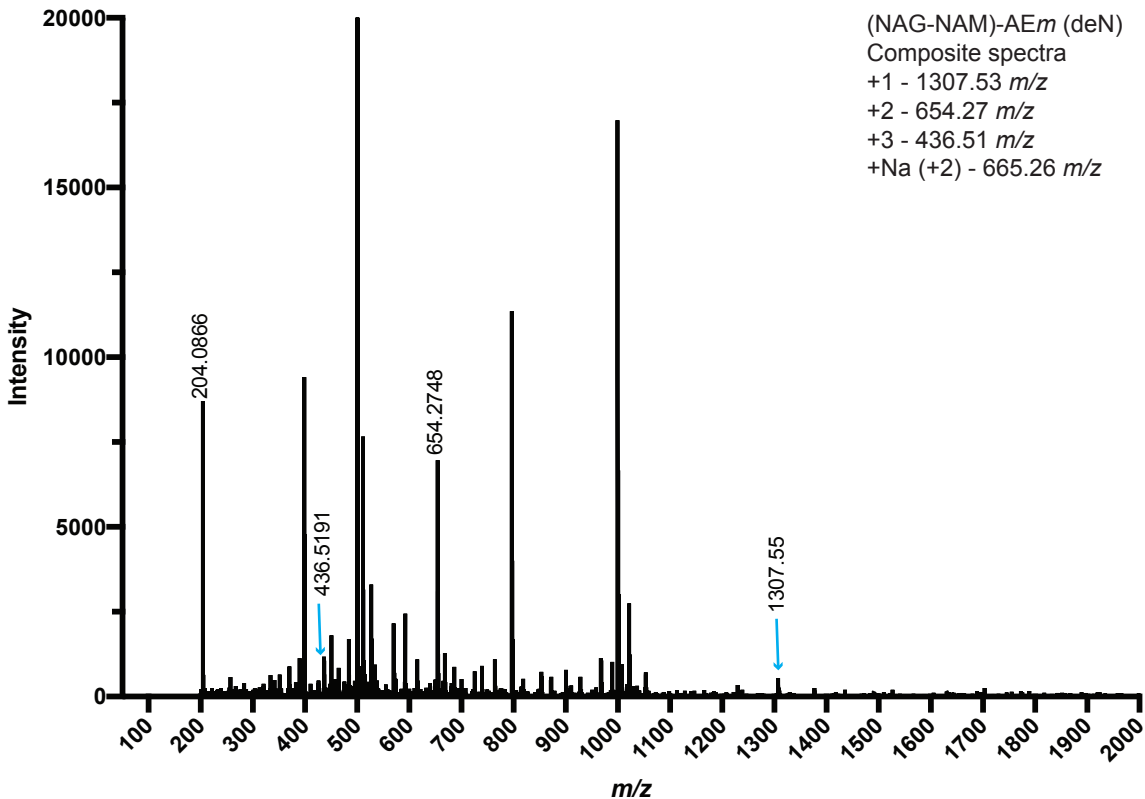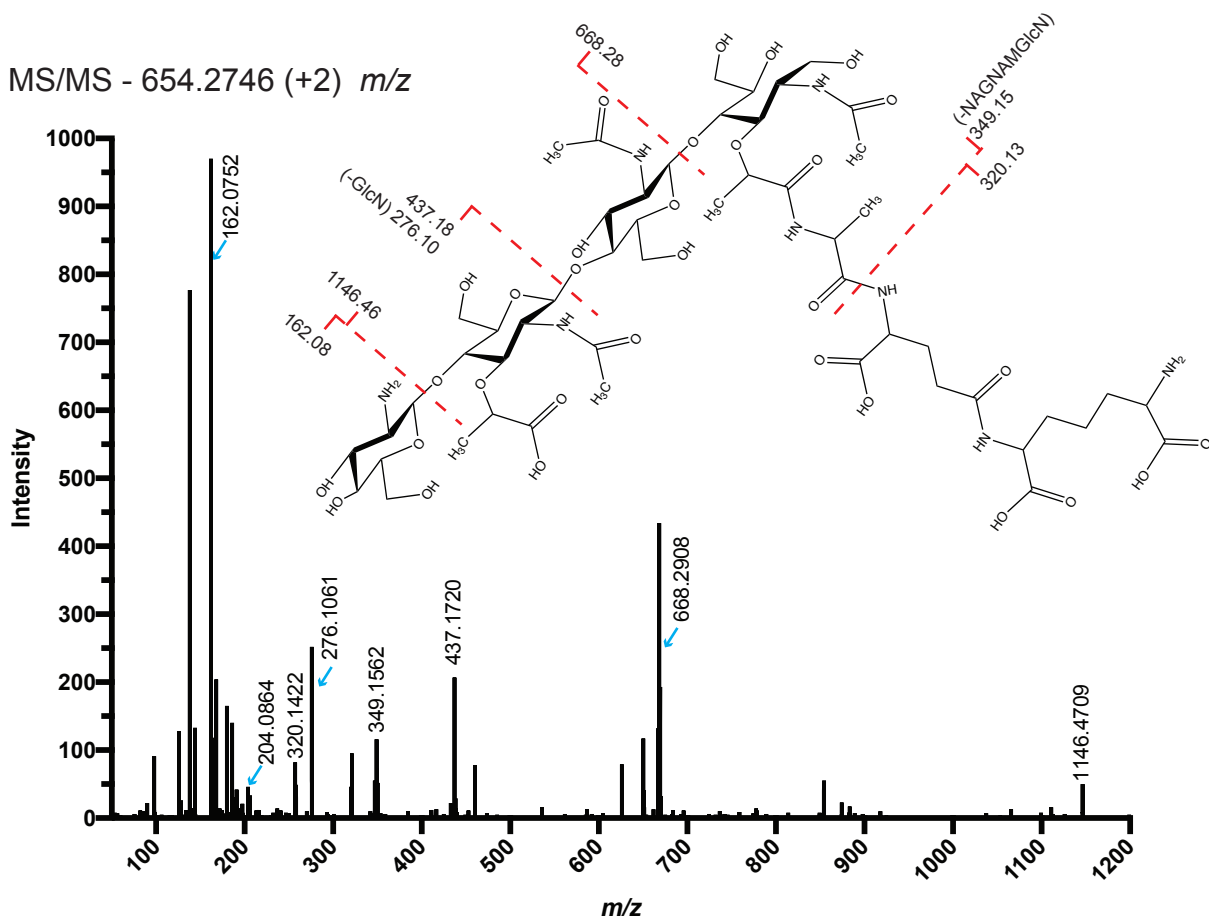

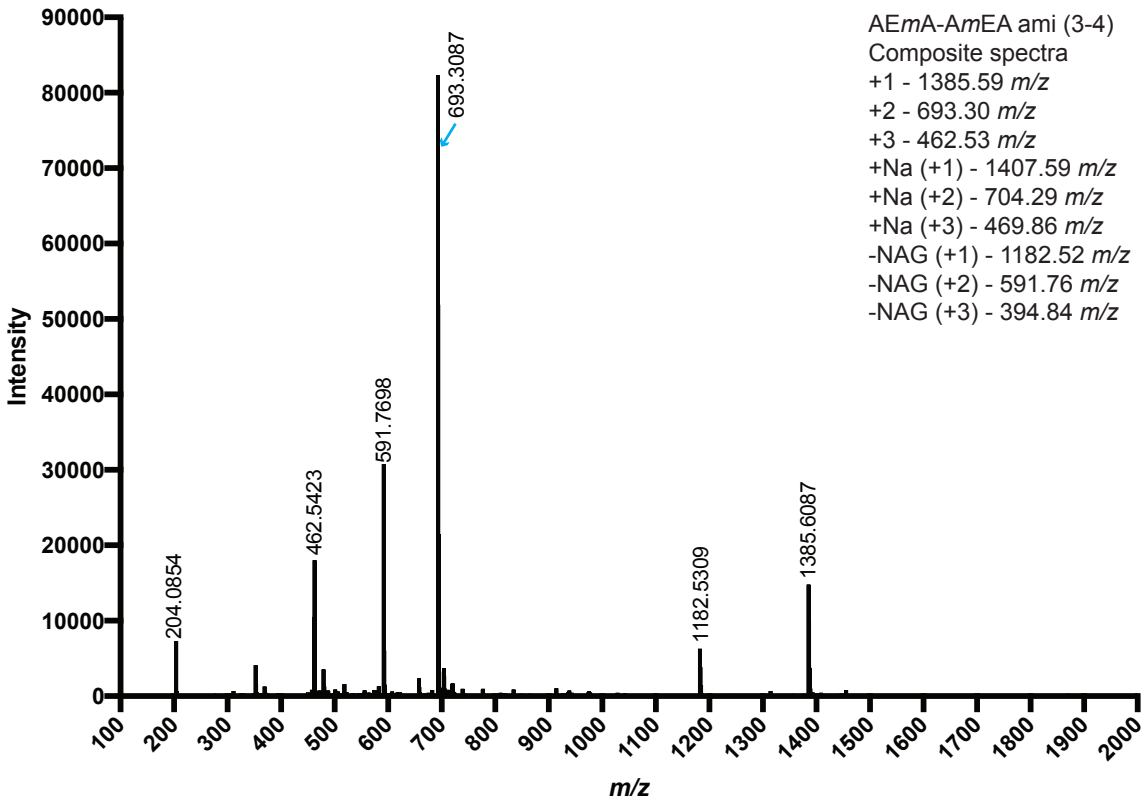

**MS/MS - (+2) 693.3054 *m/z***

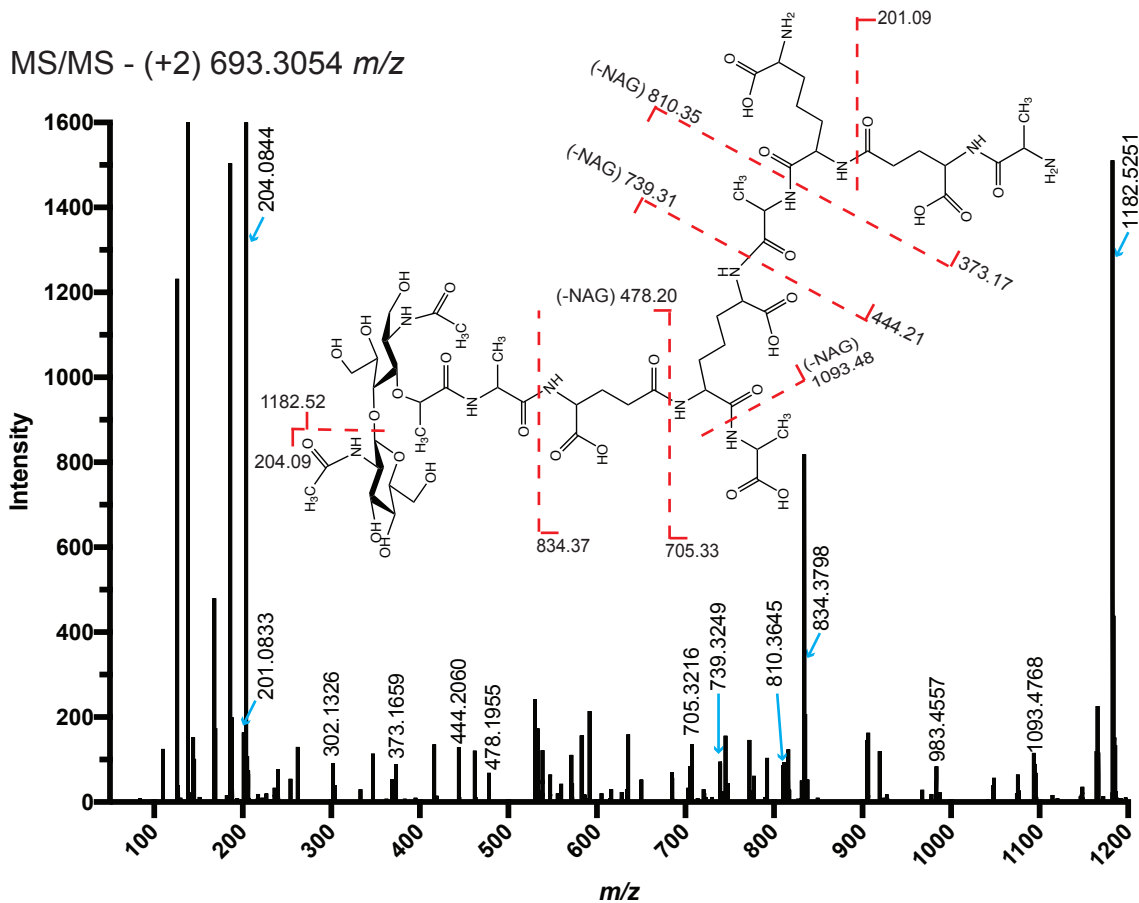

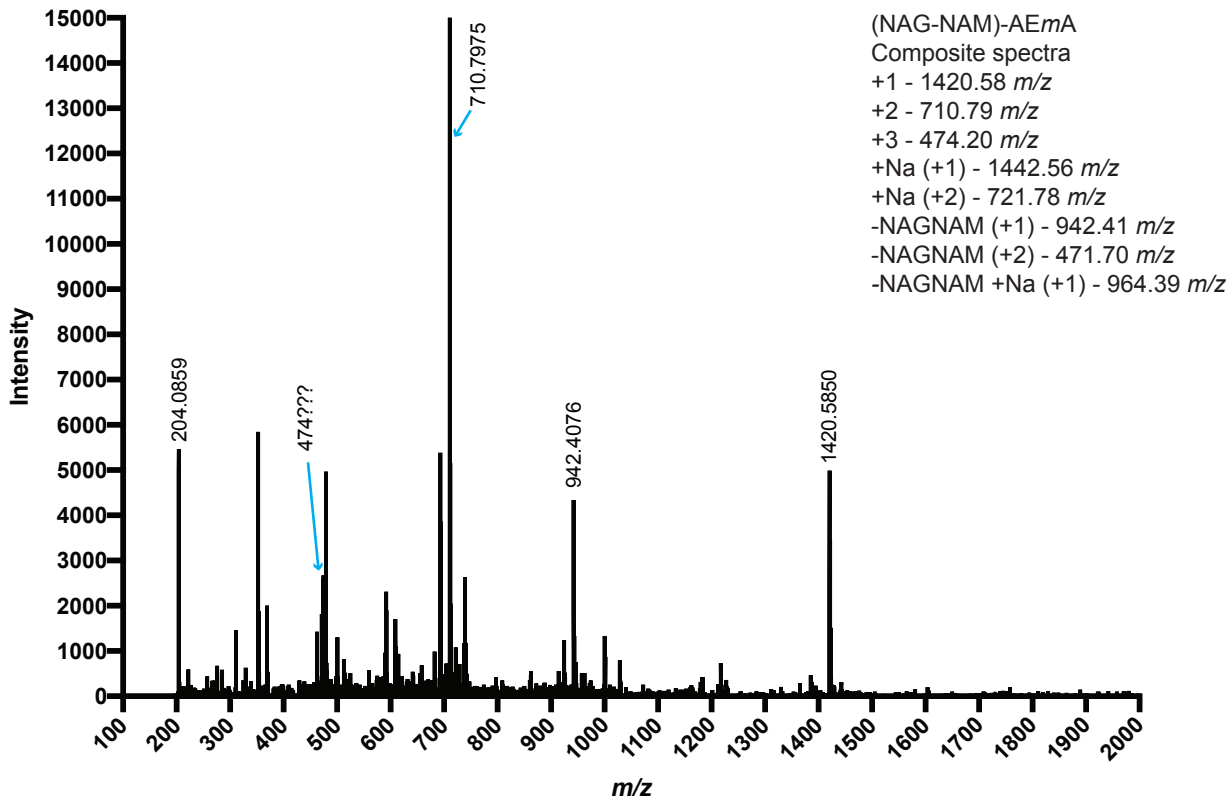

(NAG-NAM)-AEMA

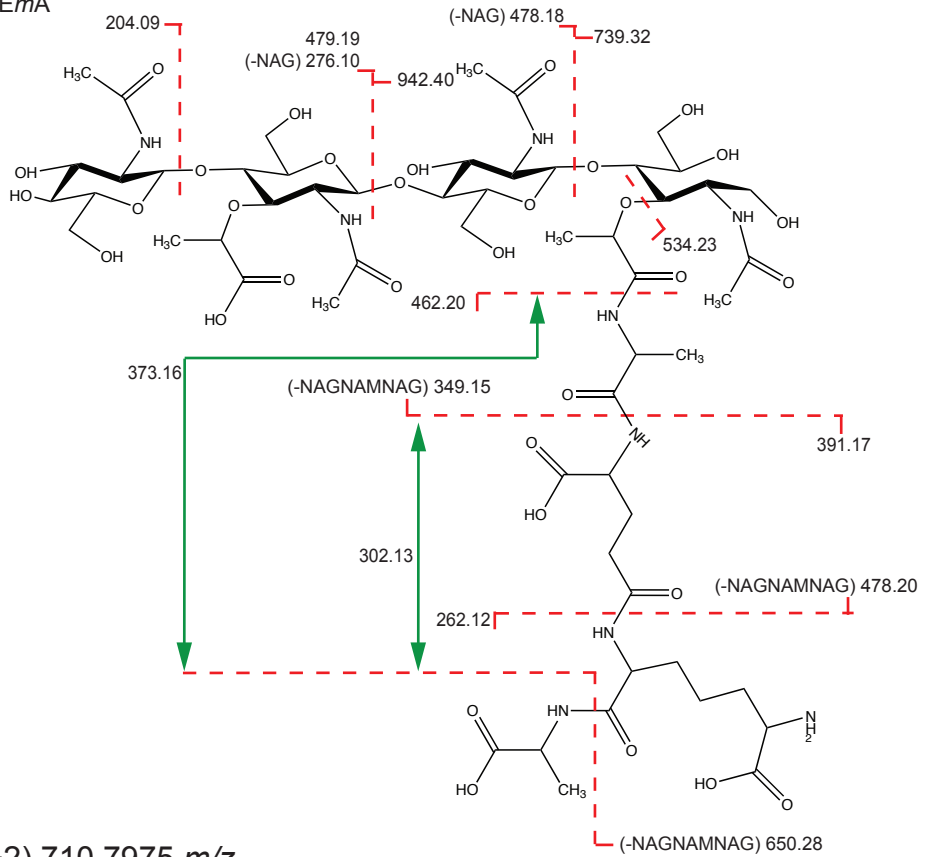

MS/MS - (+2) 710.7975 m/z

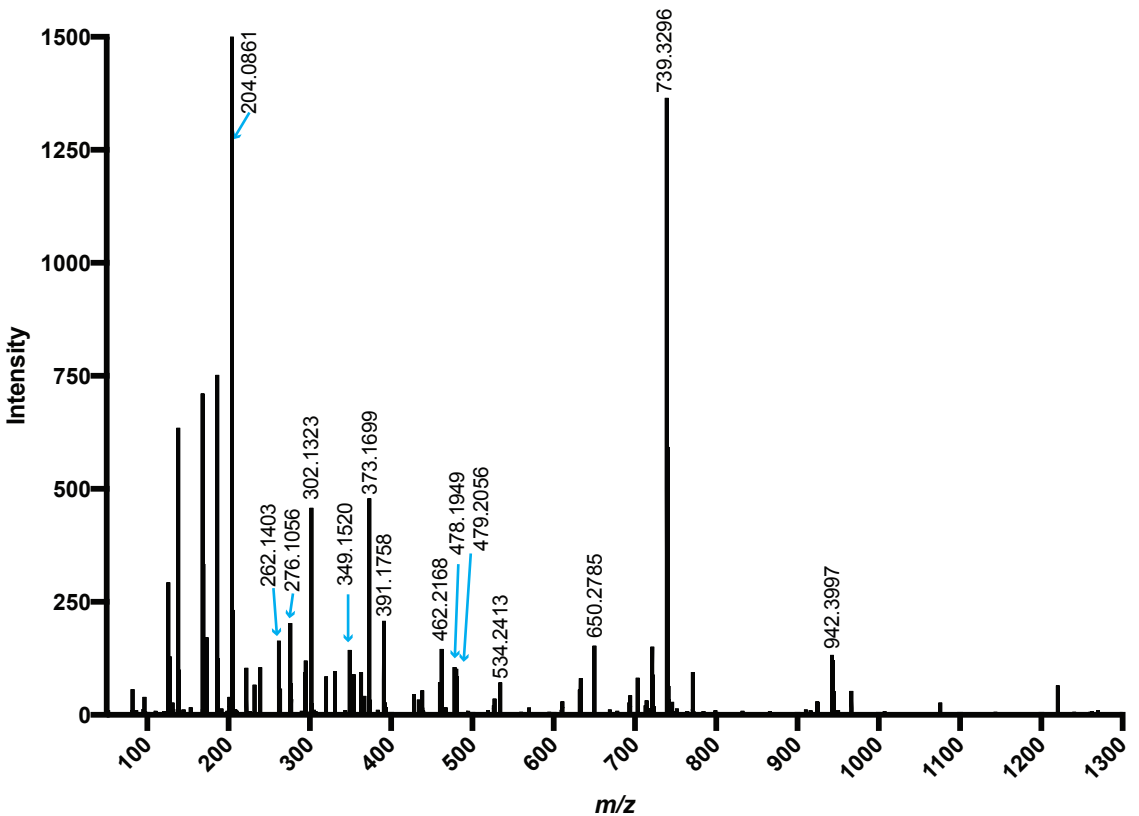

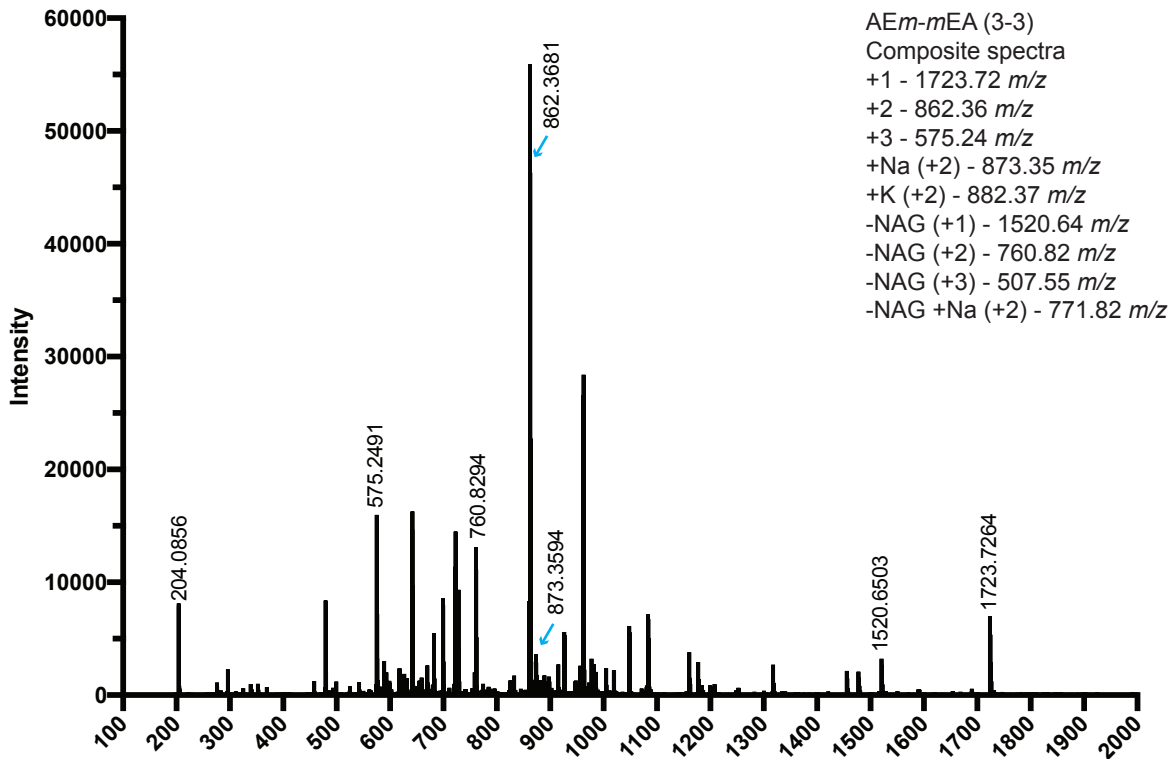



# AEm-mEA (3-3)

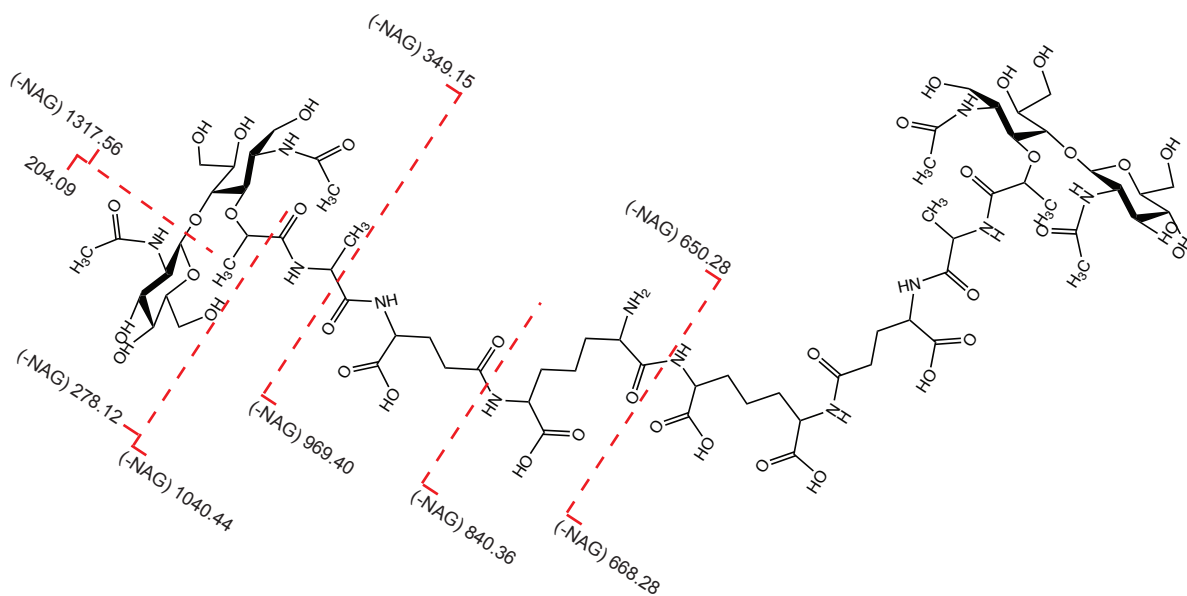

## MS/MS - 862.3681 (+2) m/z

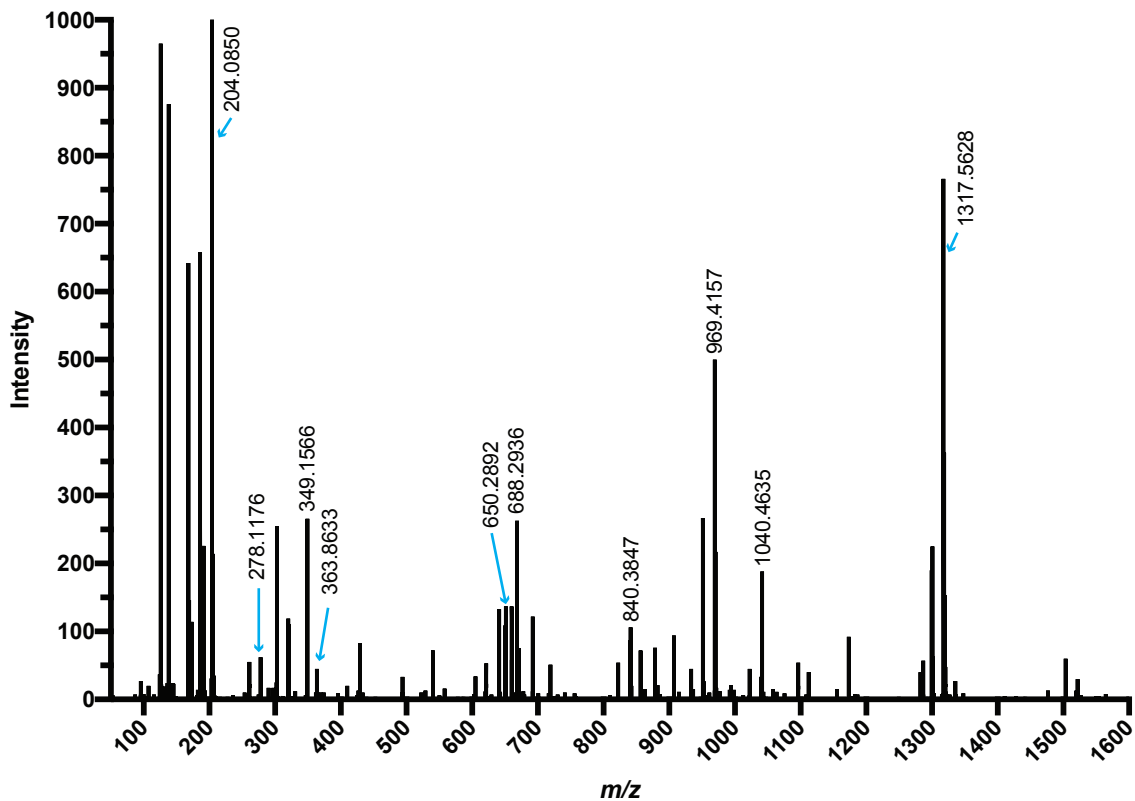

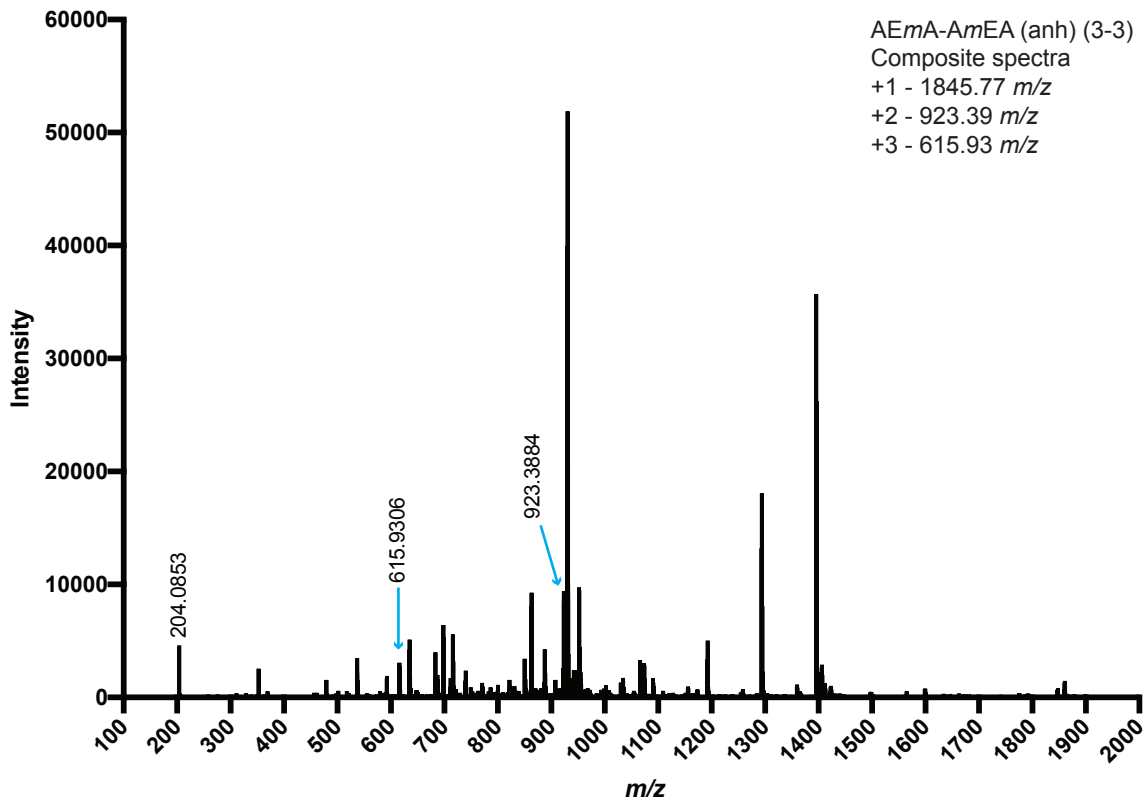

AEmA-AmEA (anh) (3-3)

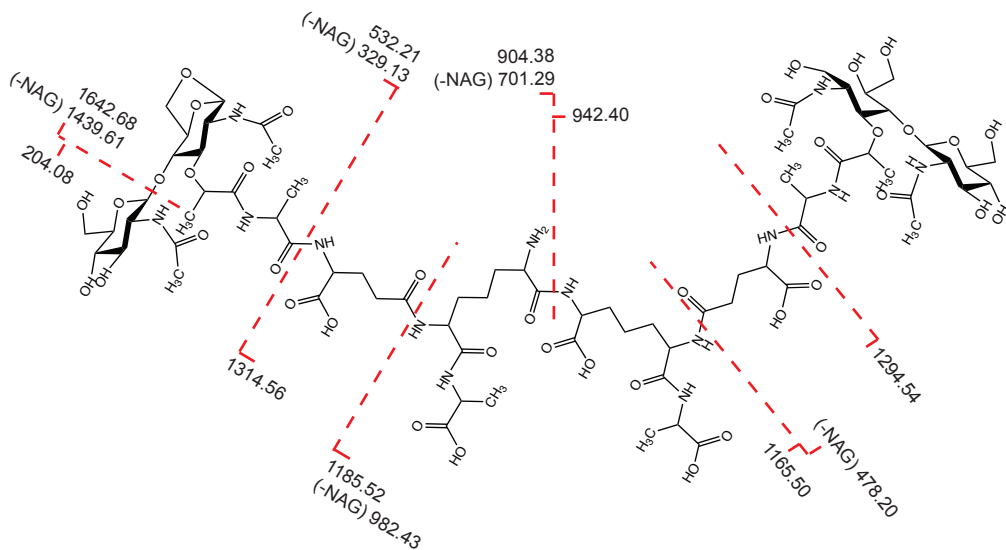

MS/MS - (+2) 923.3884 m/z

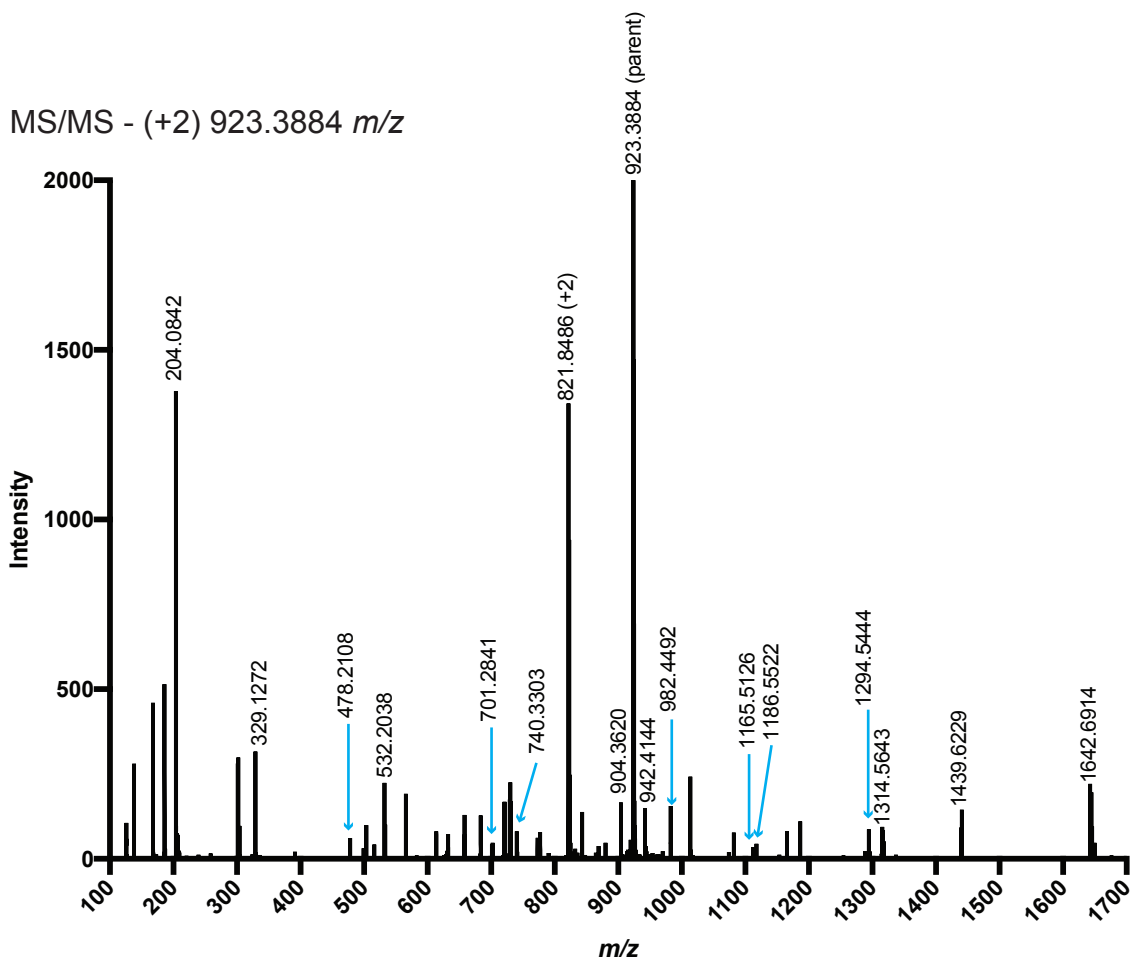

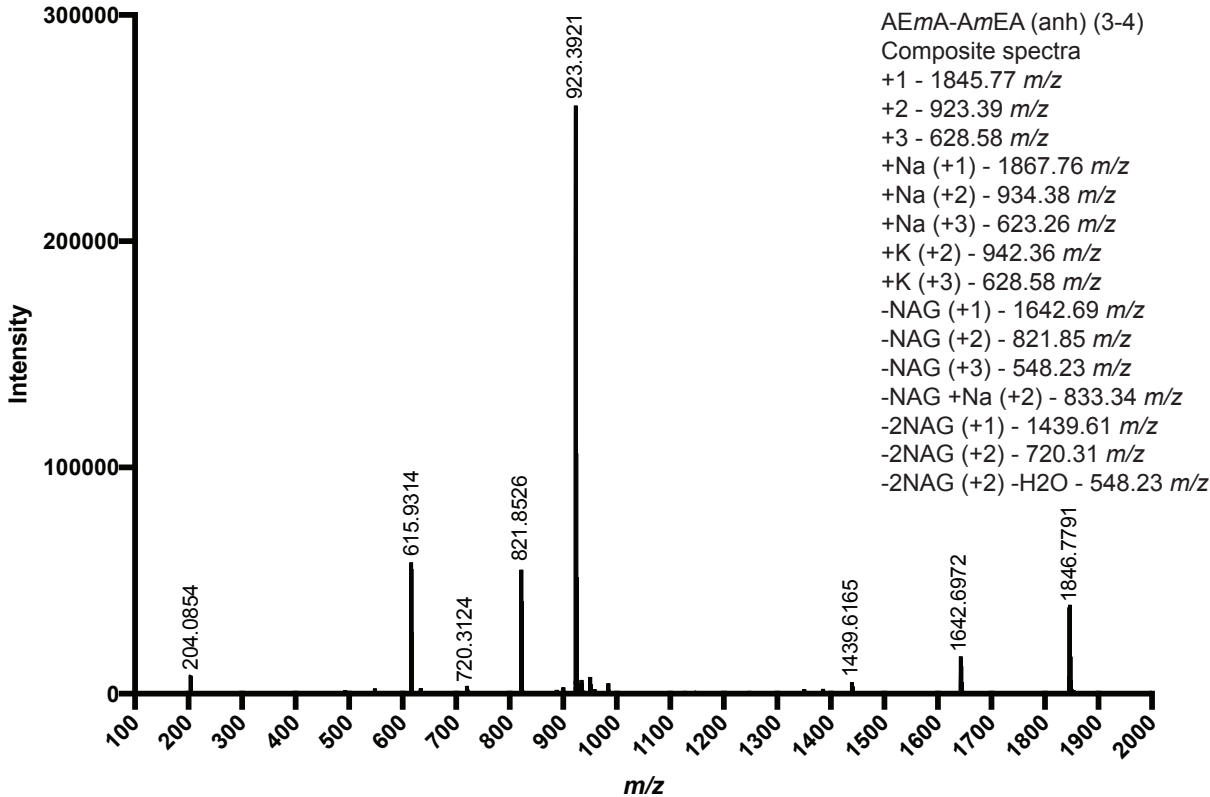

MS/MS - (+2) 923.3921 m/z

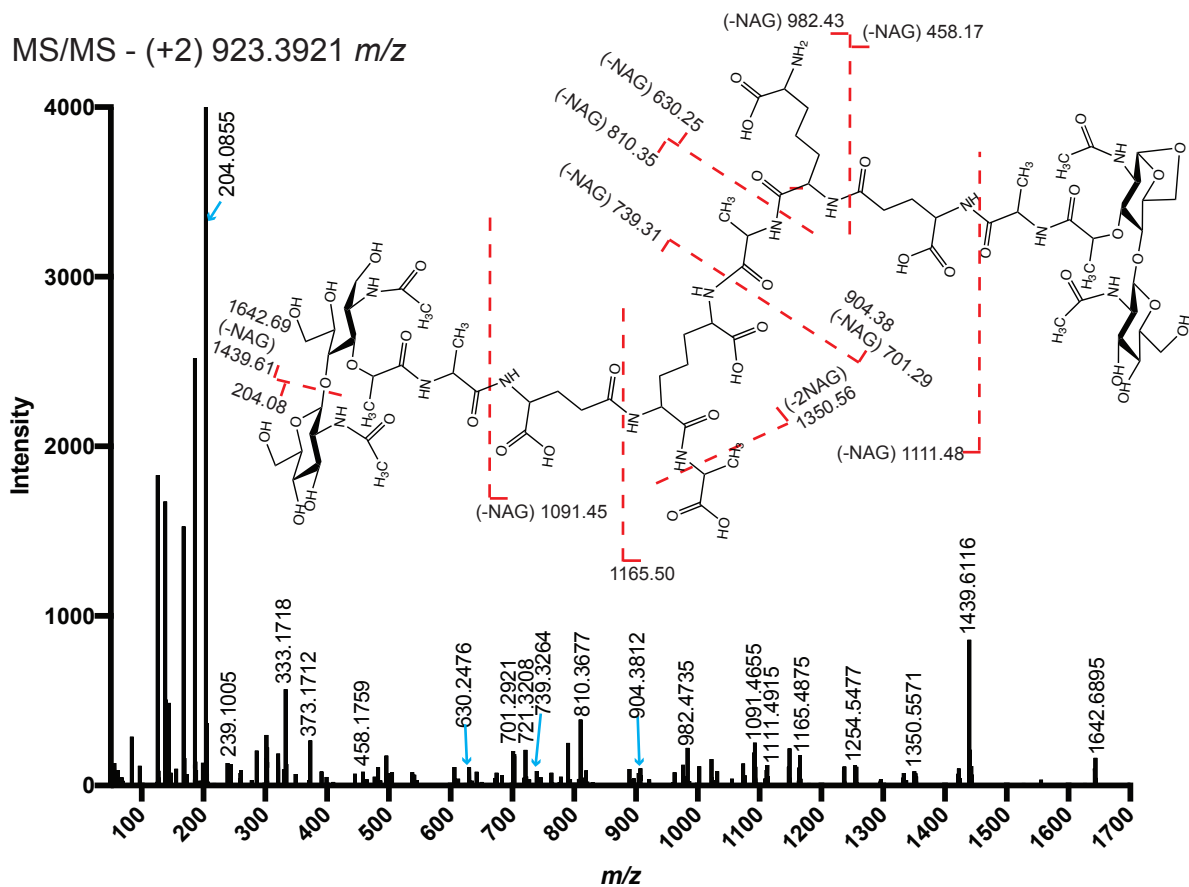

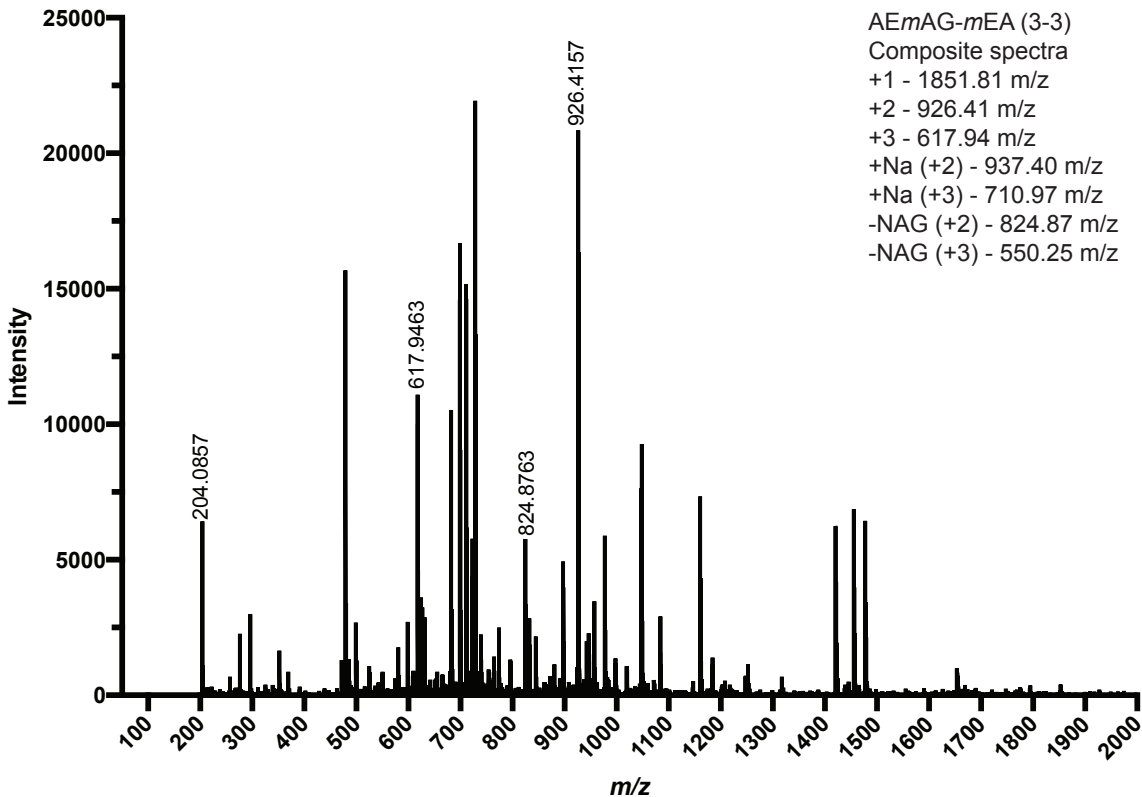

MS/MS - 926.4061 (+2)m/z

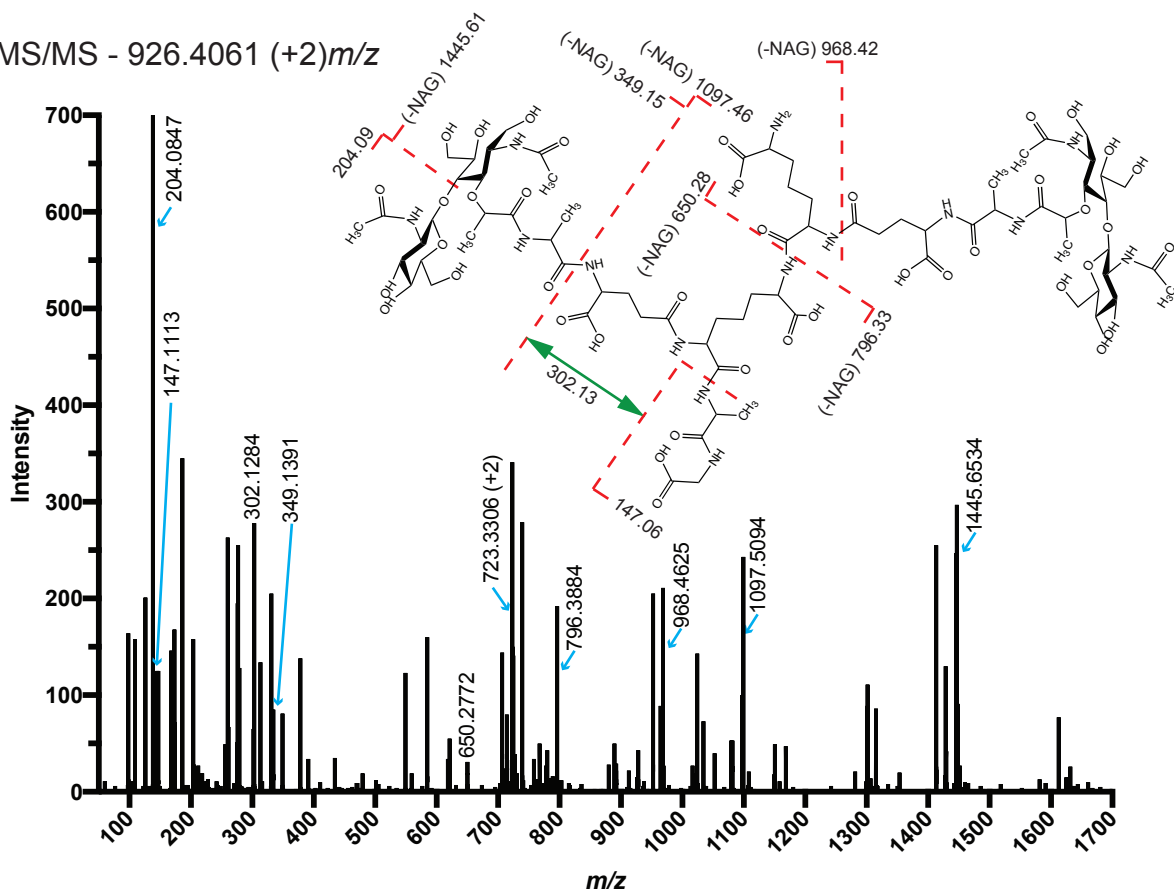

(NAG-NAM)-AEmA-AmEA (ami)

Composite spectra

+2 - 932.39  $m/z$

+3 - 621.93  $m/z$

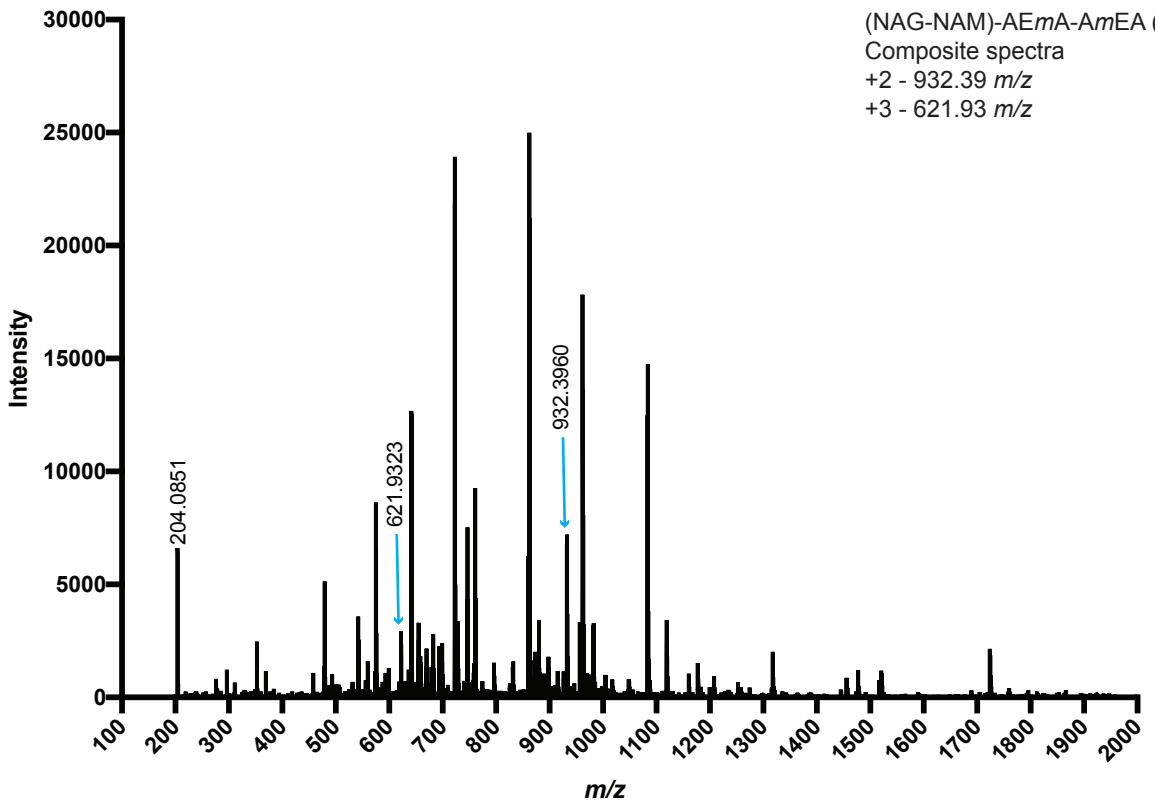

(NAG-NAM)-AEmA-AmeA (ami)

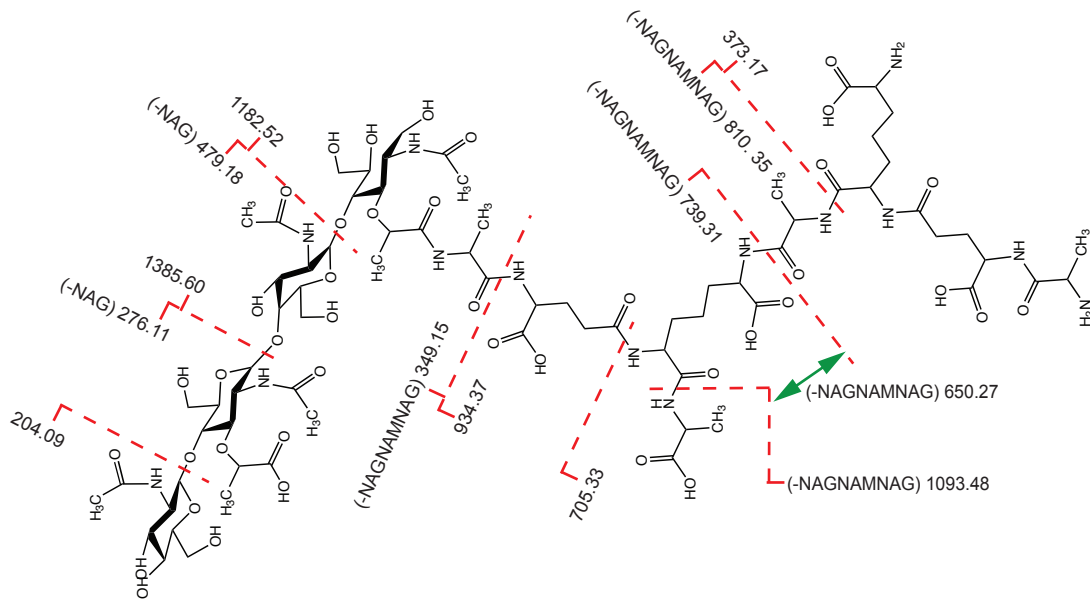

MS/MS - 932.3968 (+2) m/z

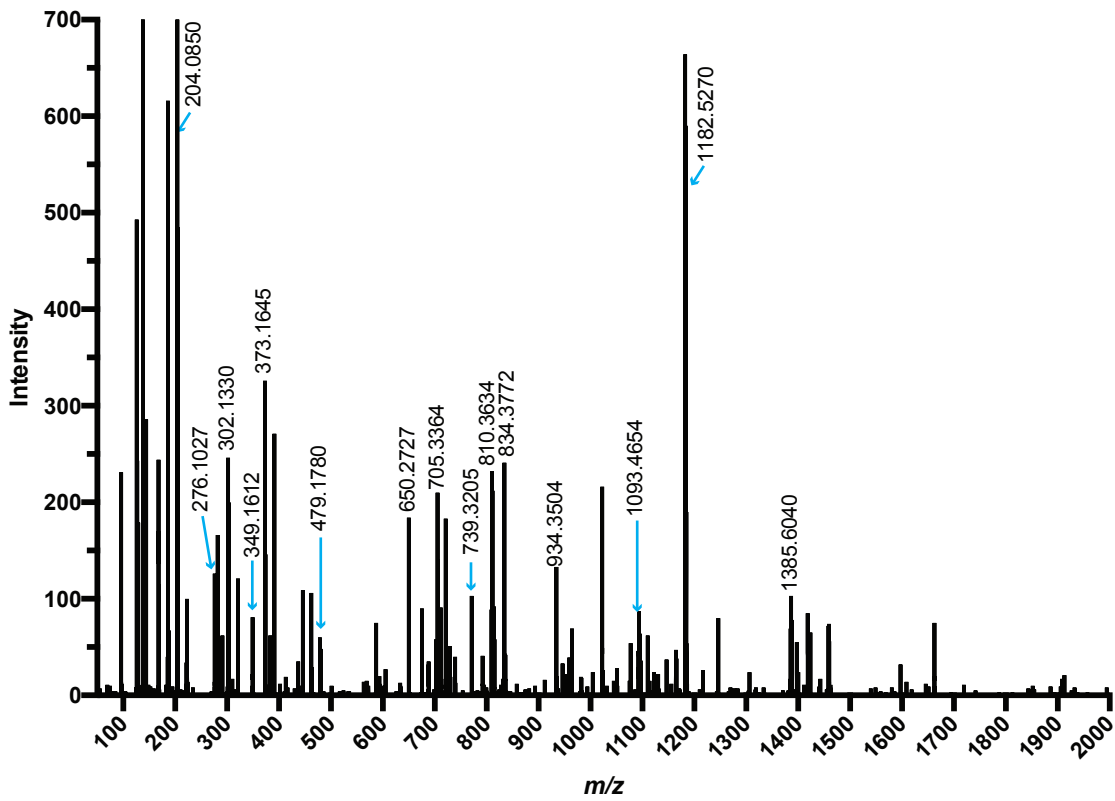

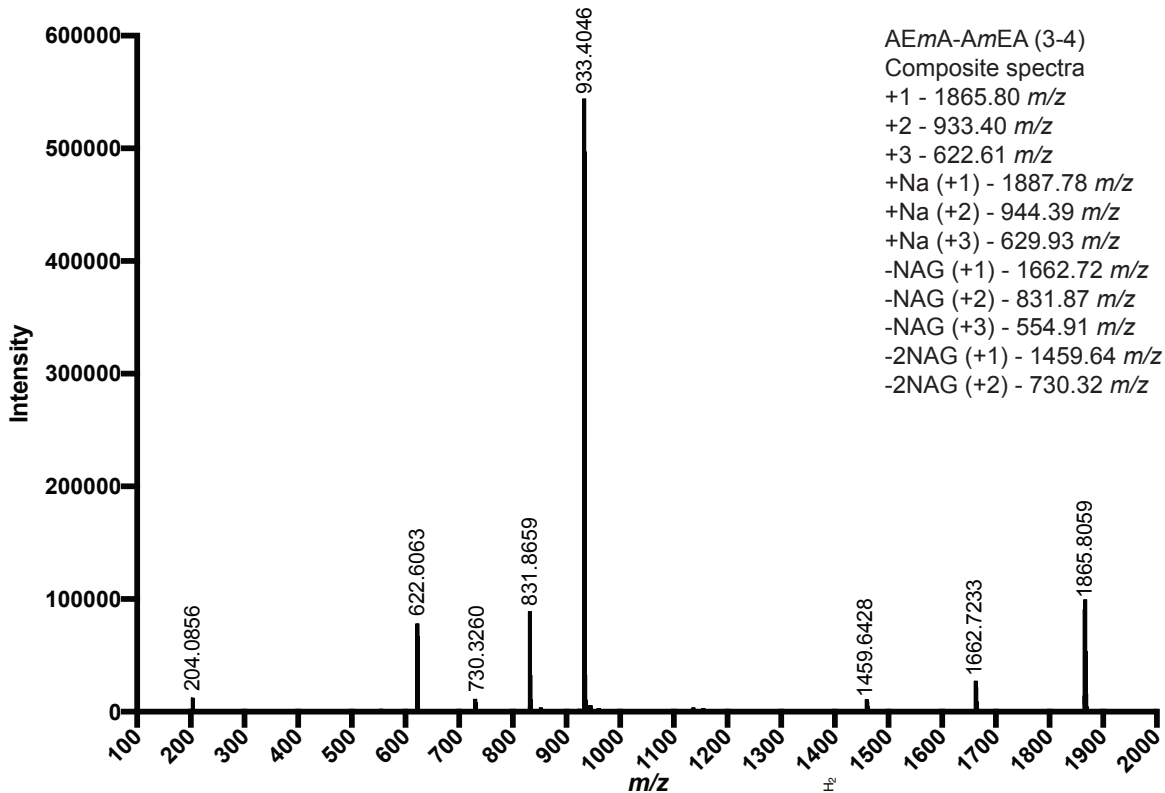

**MS/MS - (+2) 933.4046 *m/z***

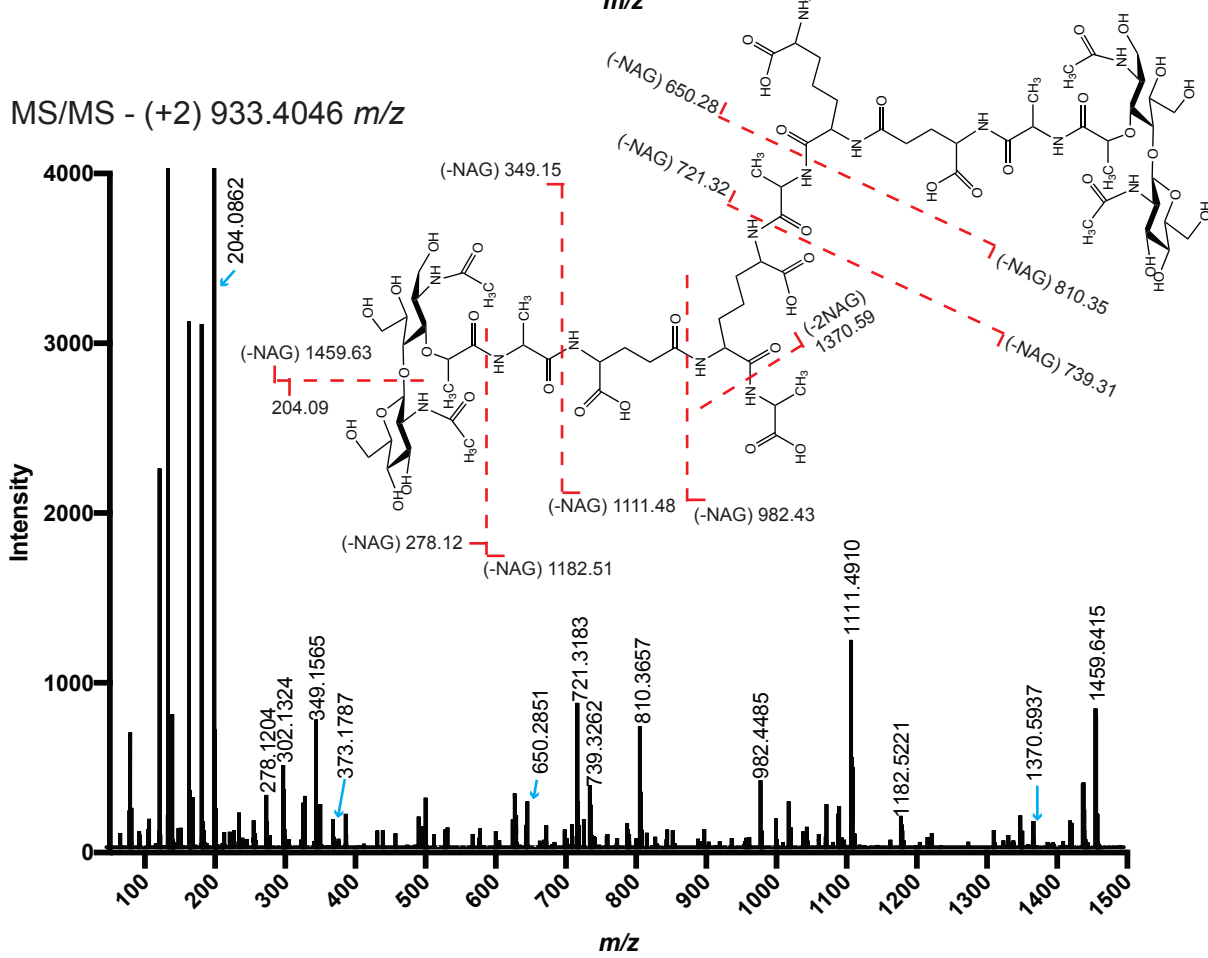



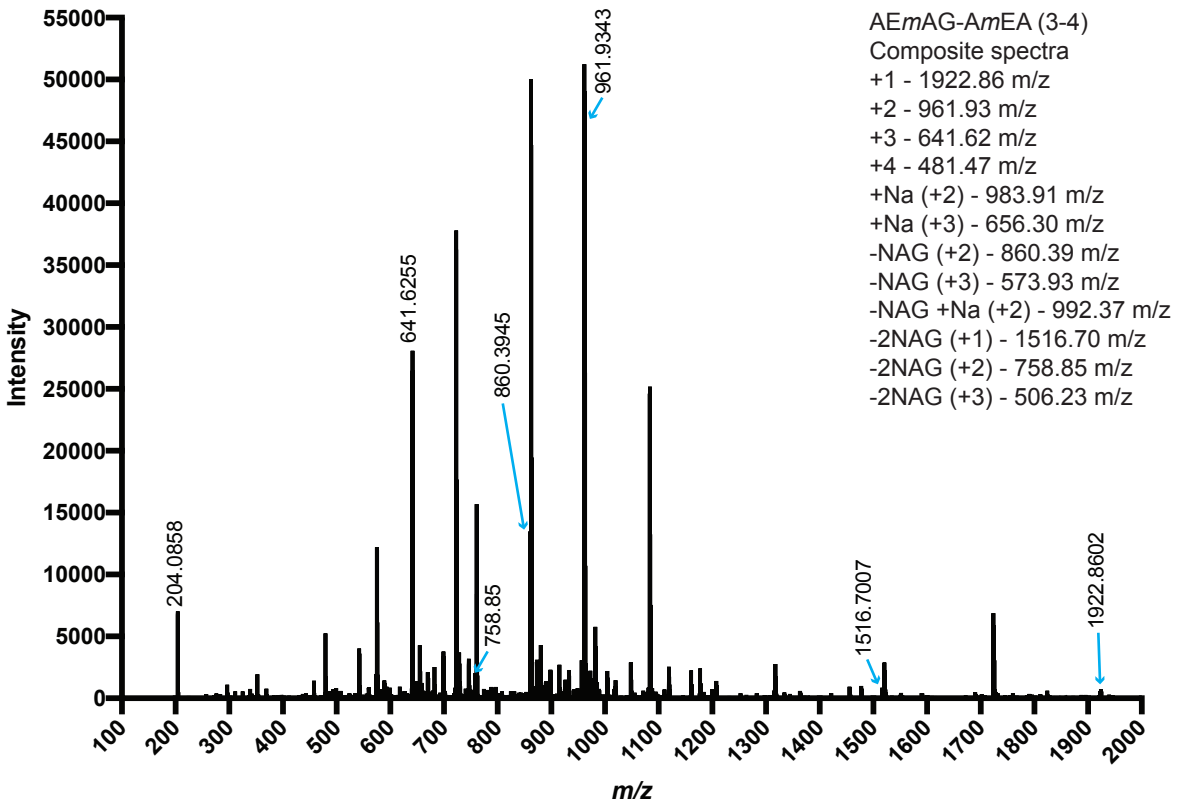

AEmAG-AmEA (3-4)

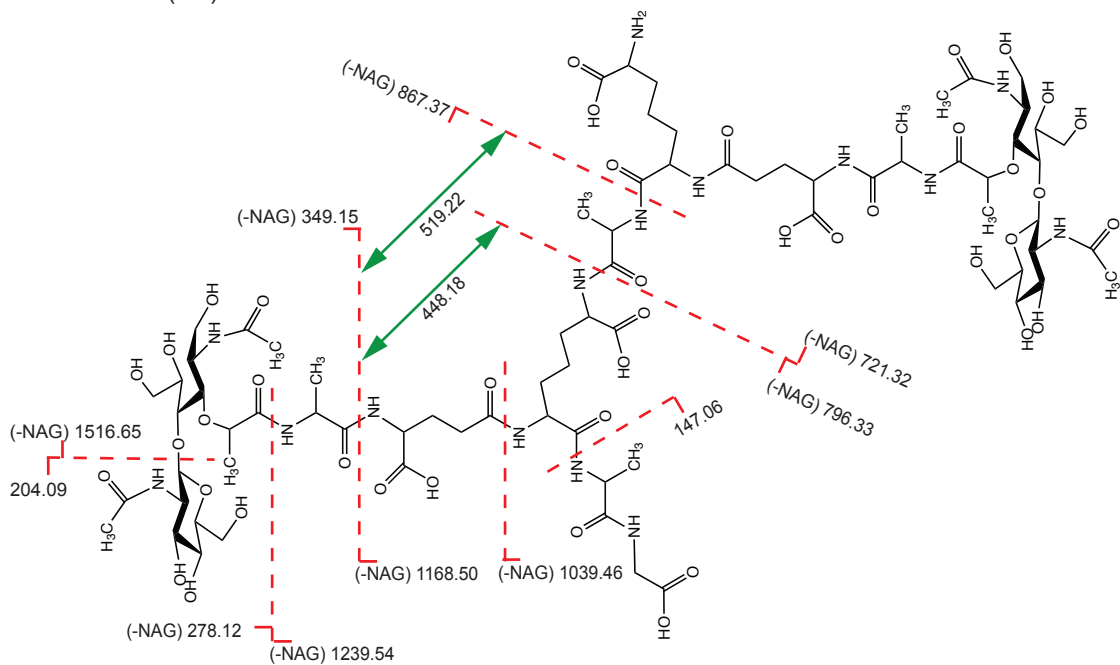

MS/MS - 961.9317 (+2) *m/z*

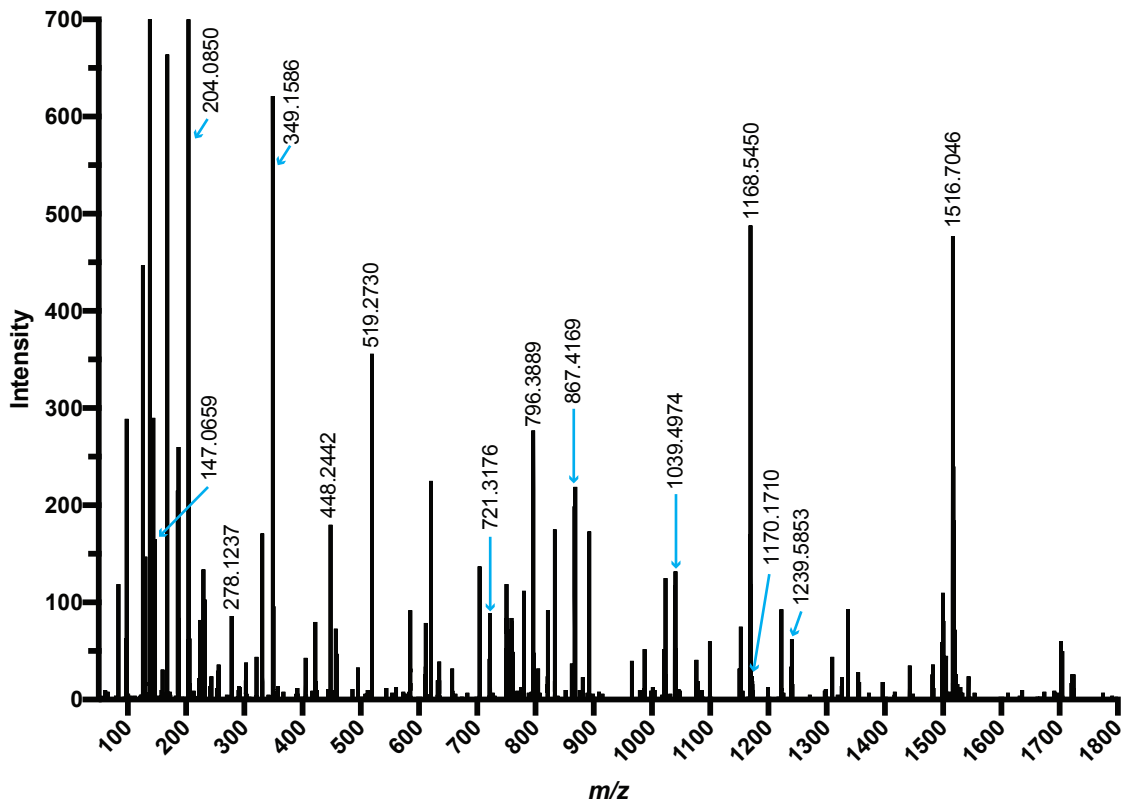

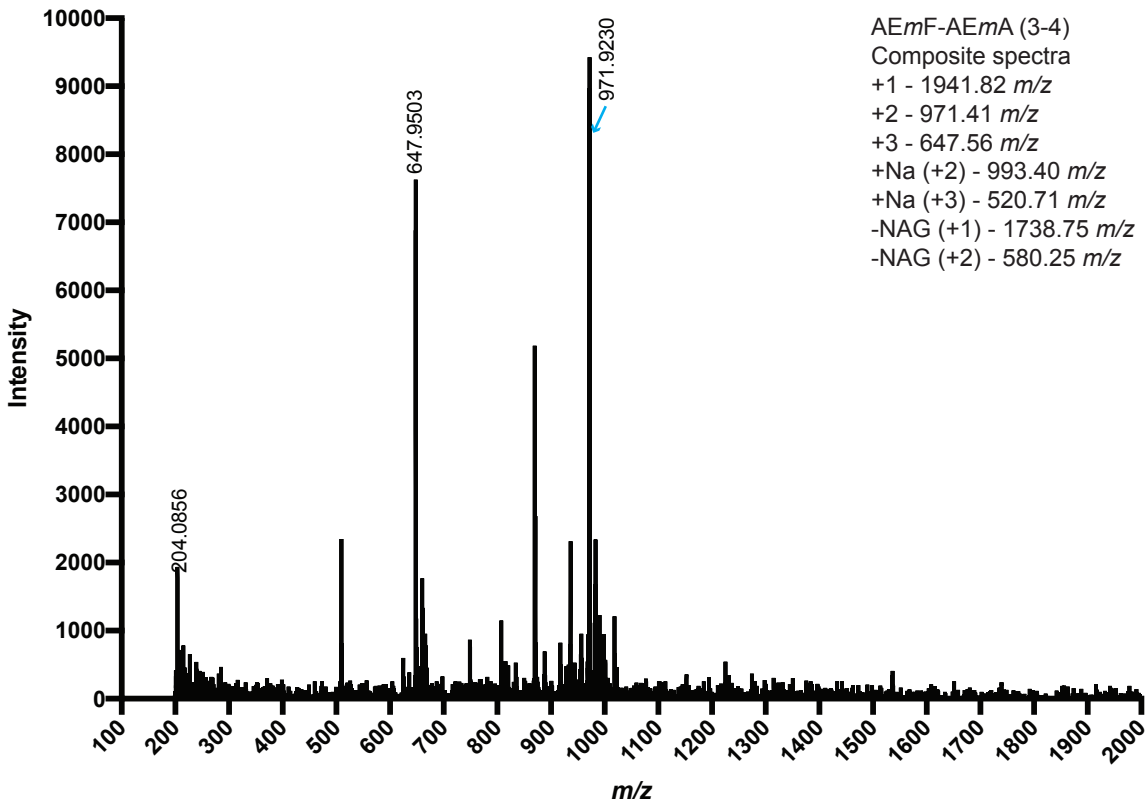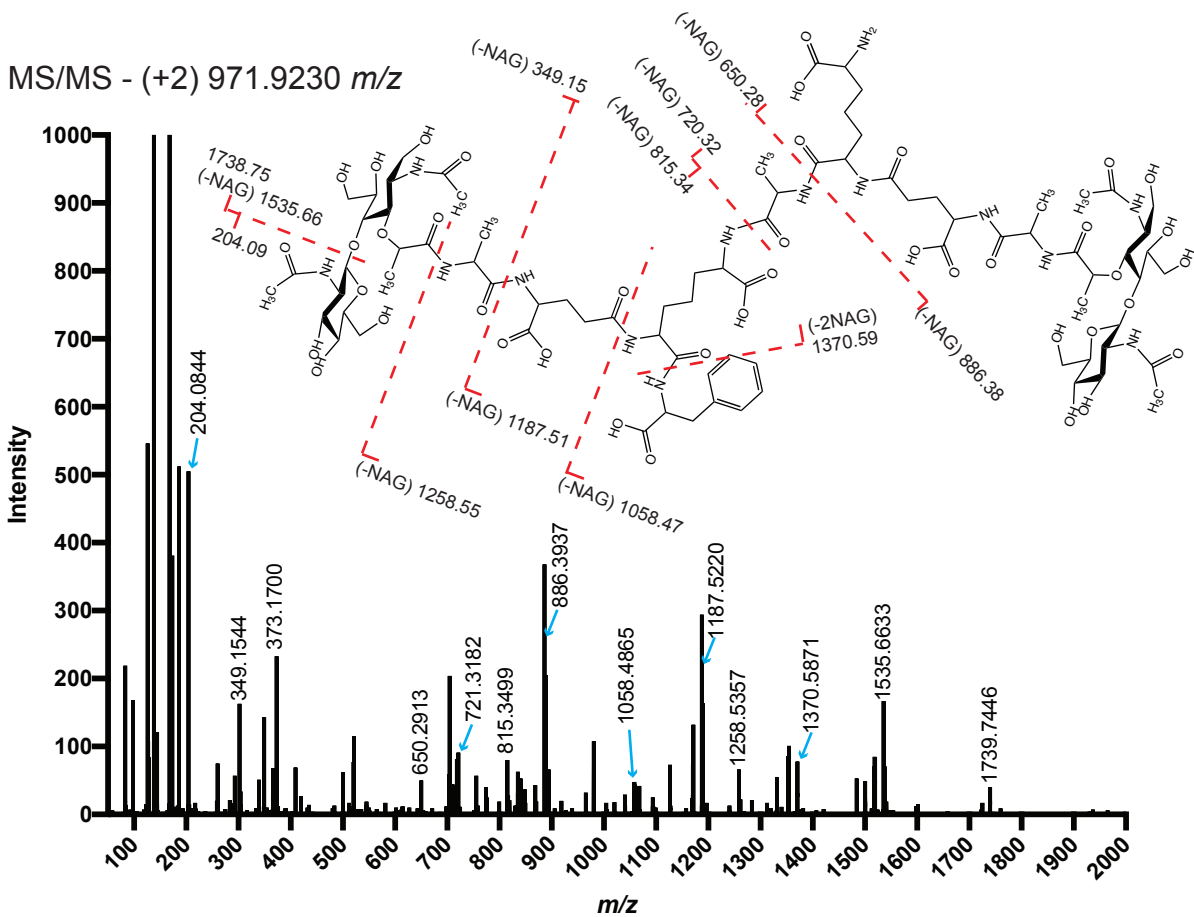

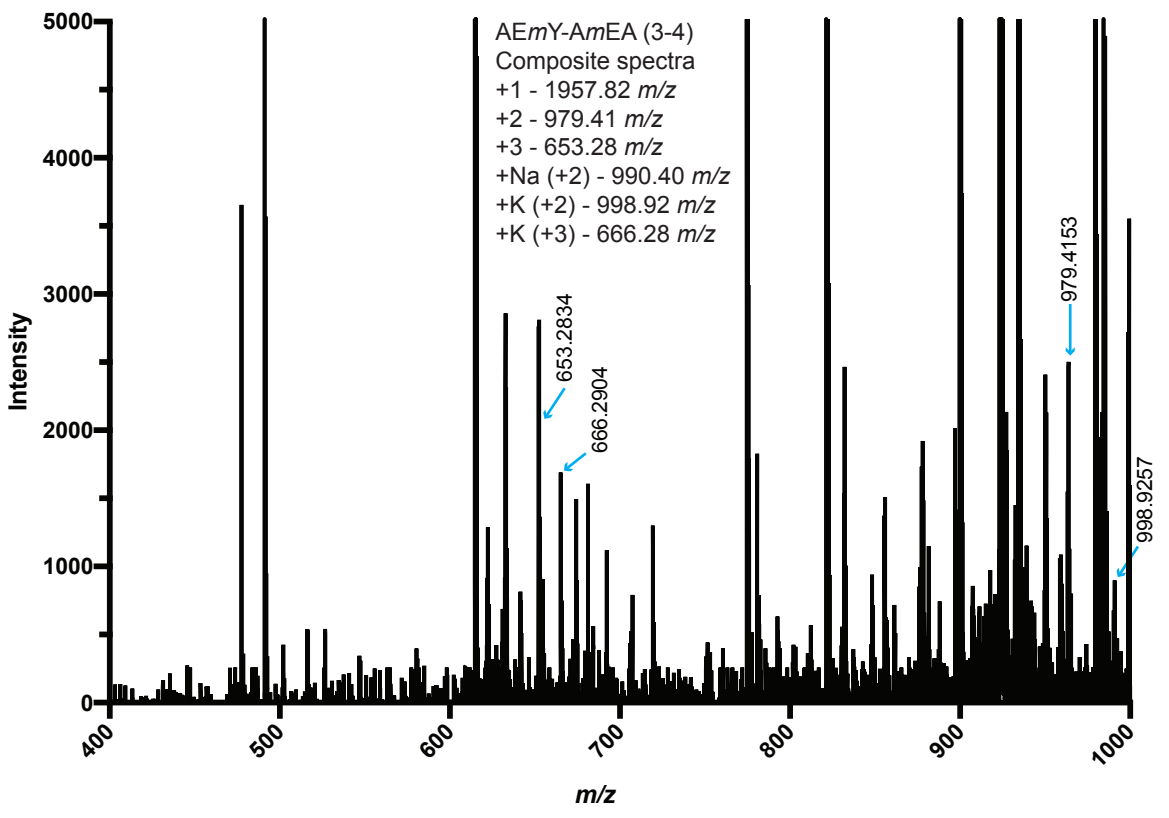

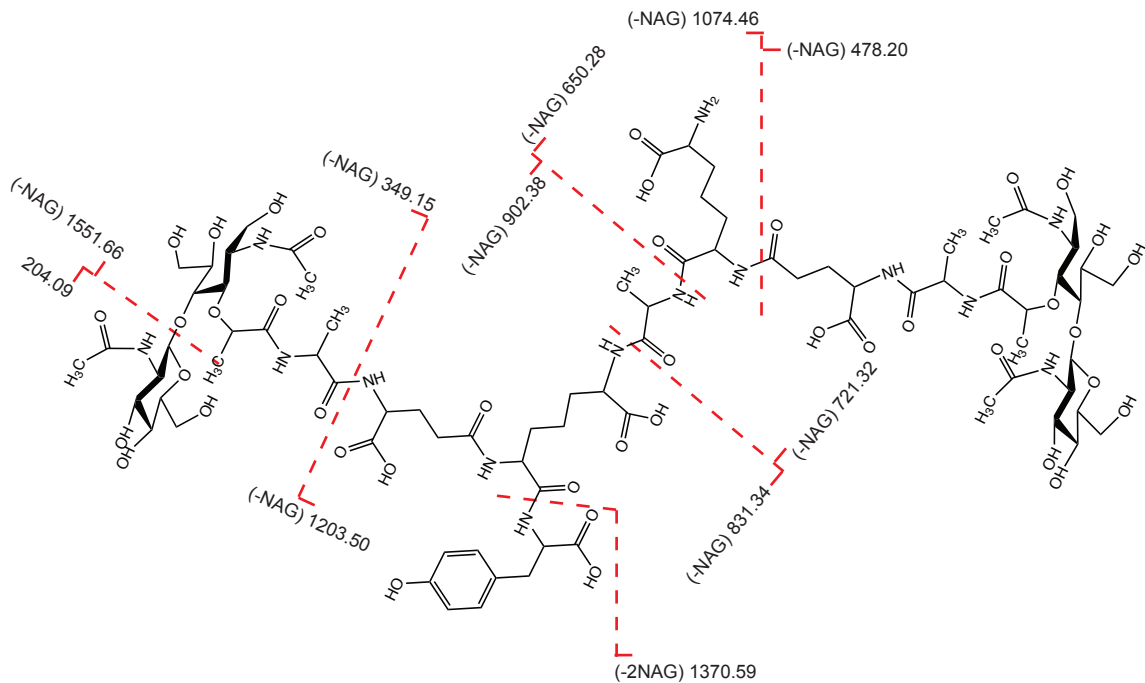

MS/MS - 979.4177 (+2) m/z

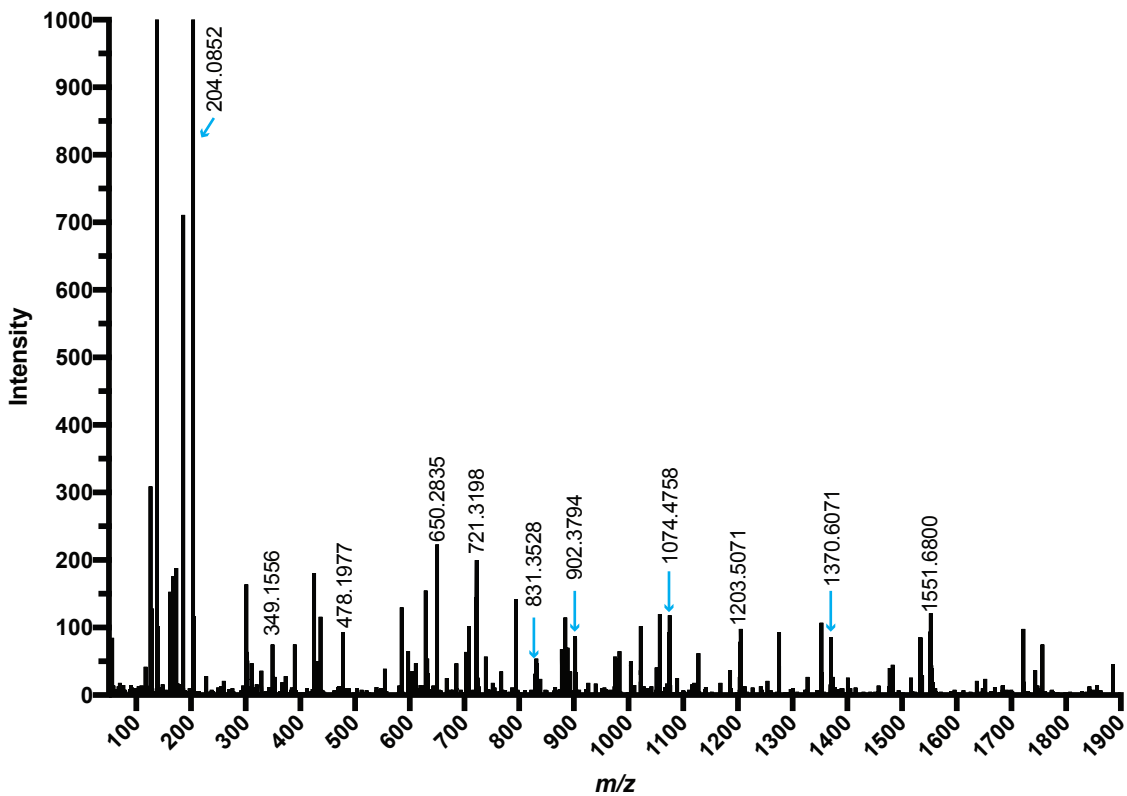

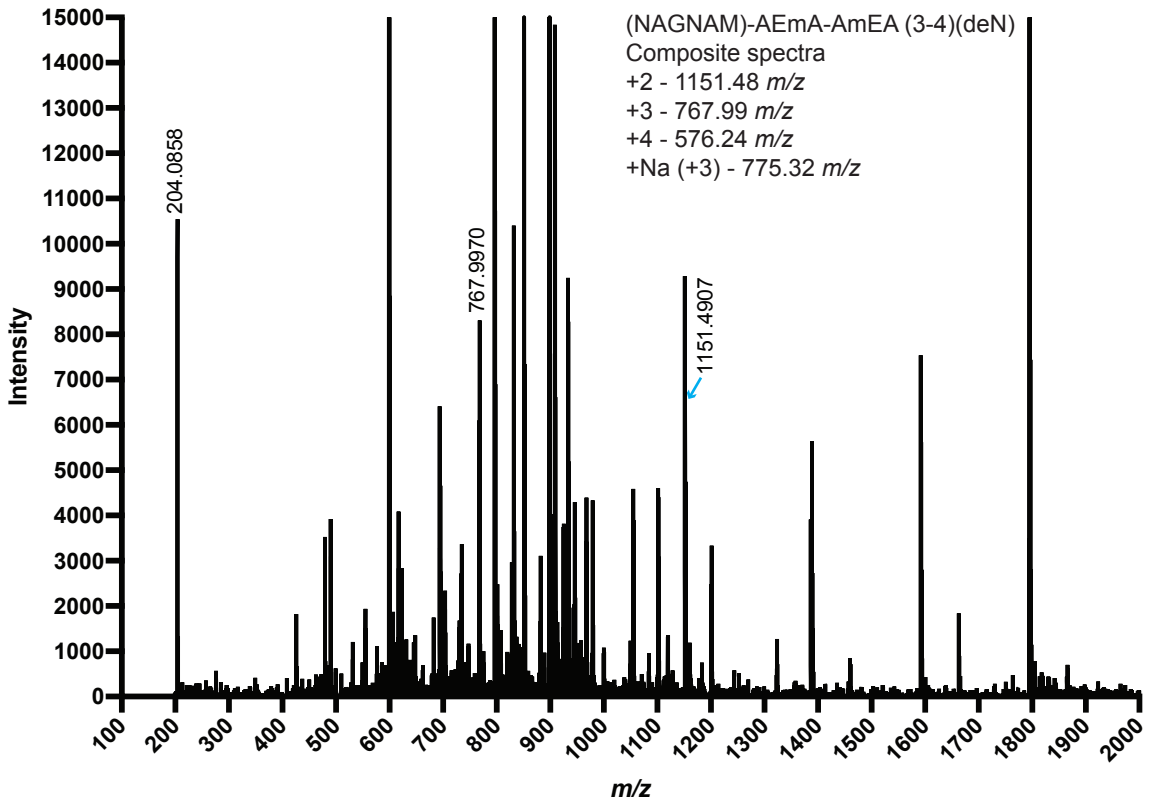

(NAGNAM)-AEmA-AmEA (3-4)(deN)

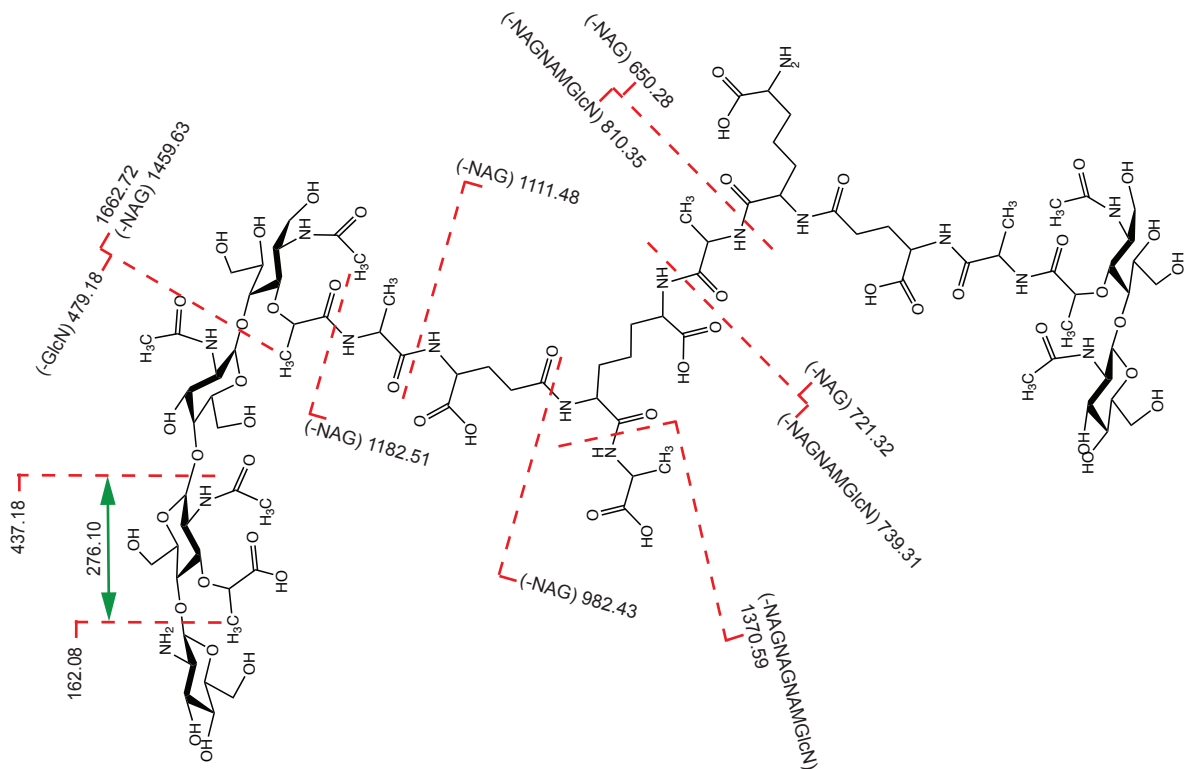

MS/MS - 1151.4886 (+2) *m/z*

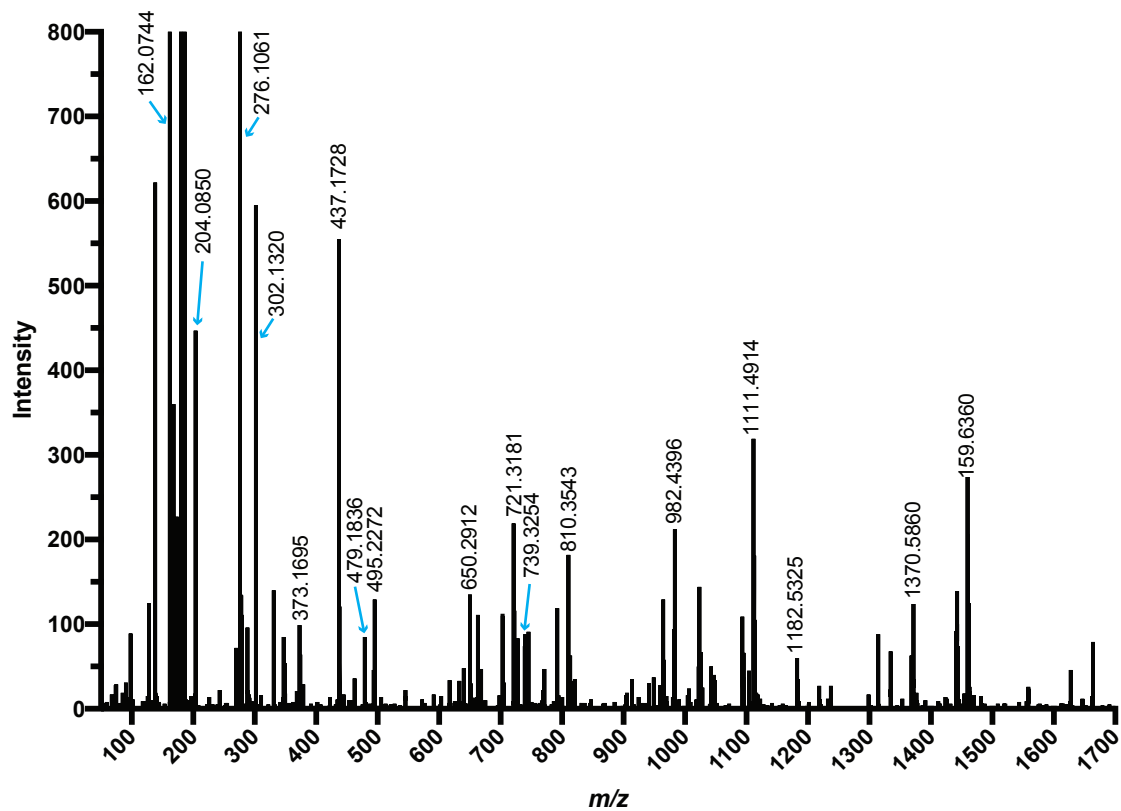

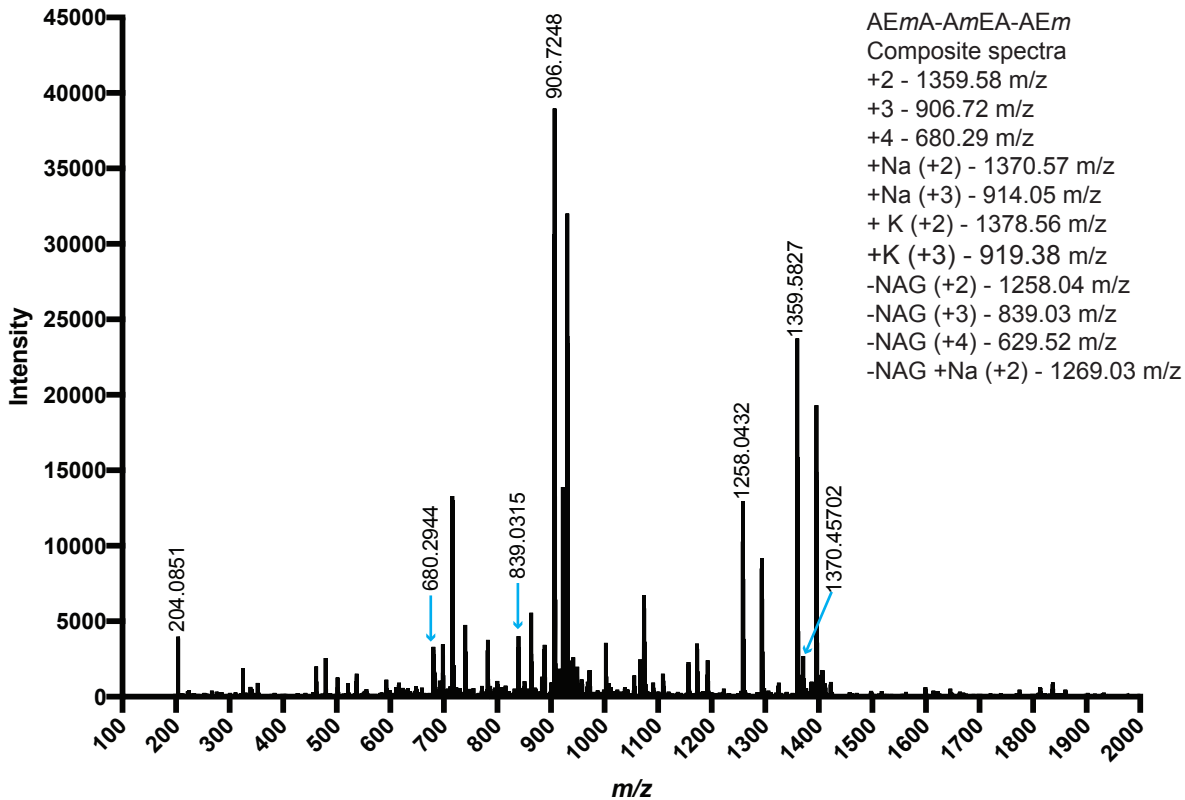



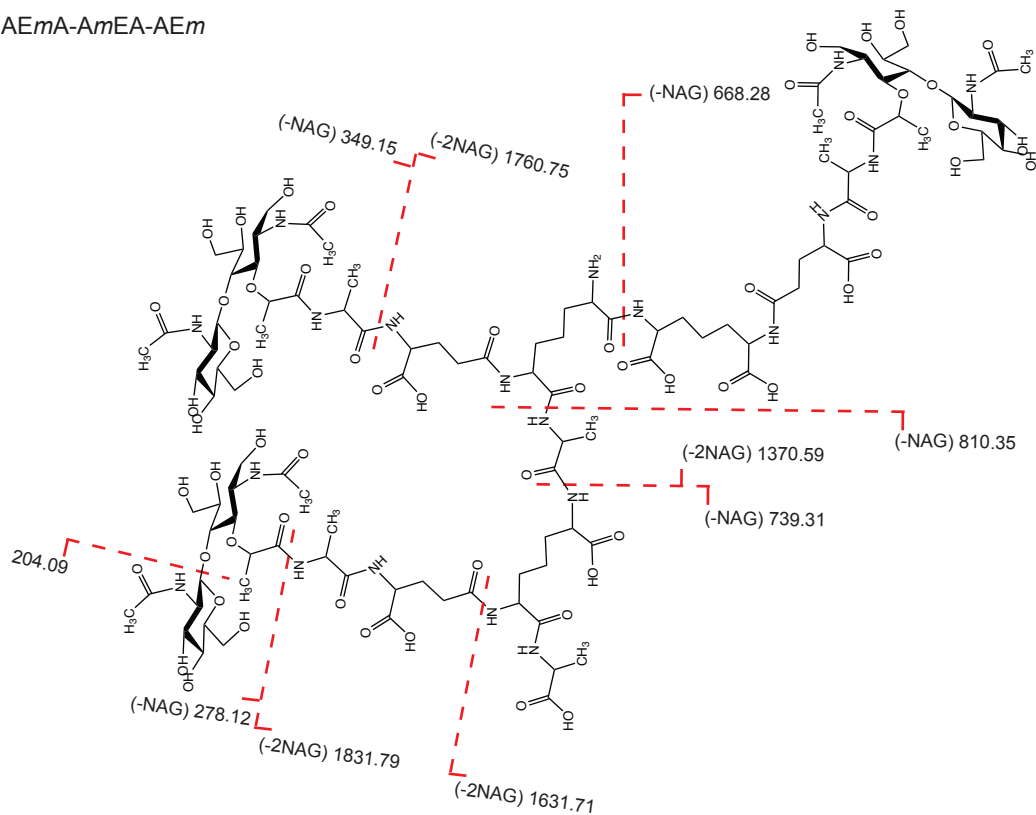

MS/MS - (+2) 1359.5815 *m/z*

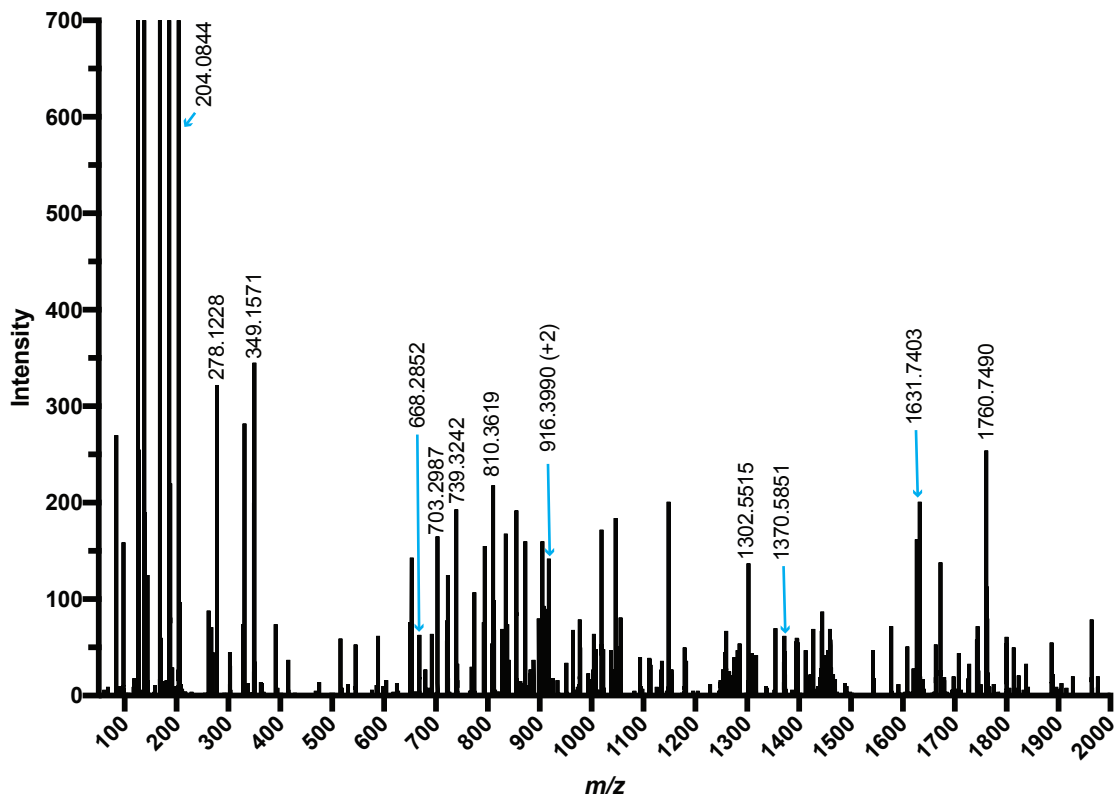

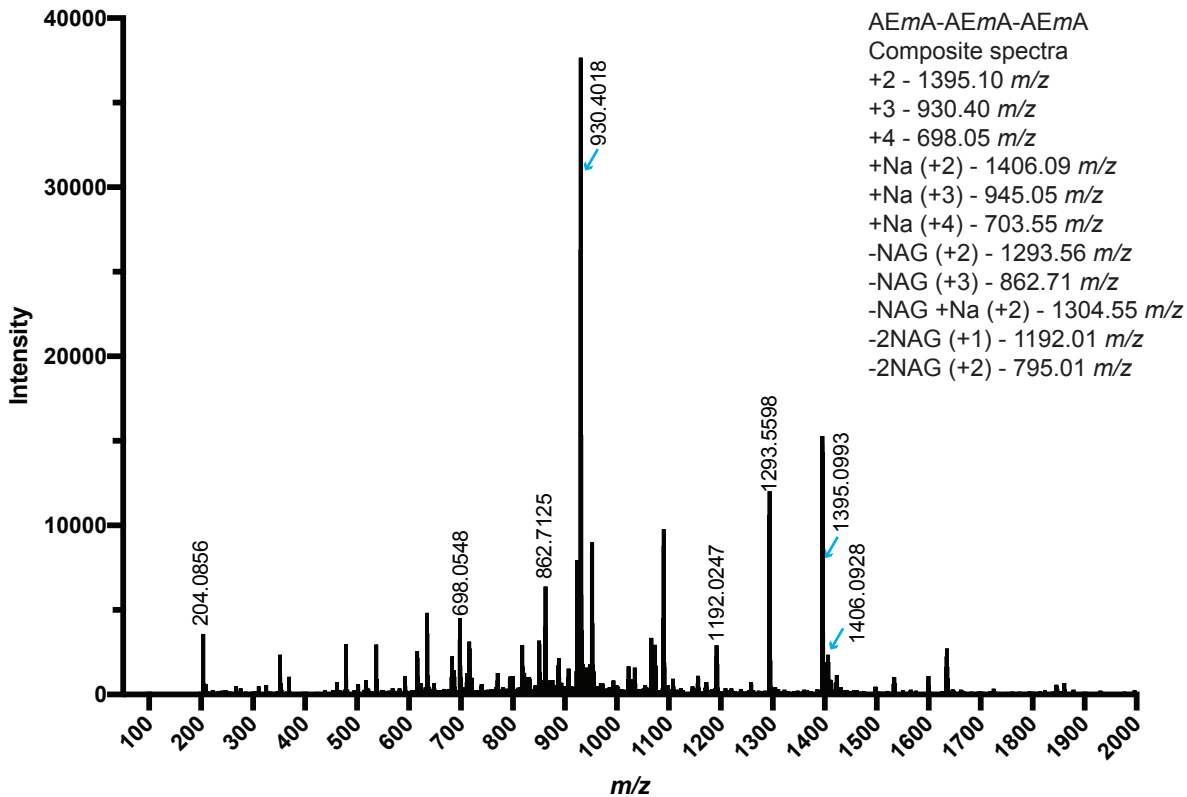

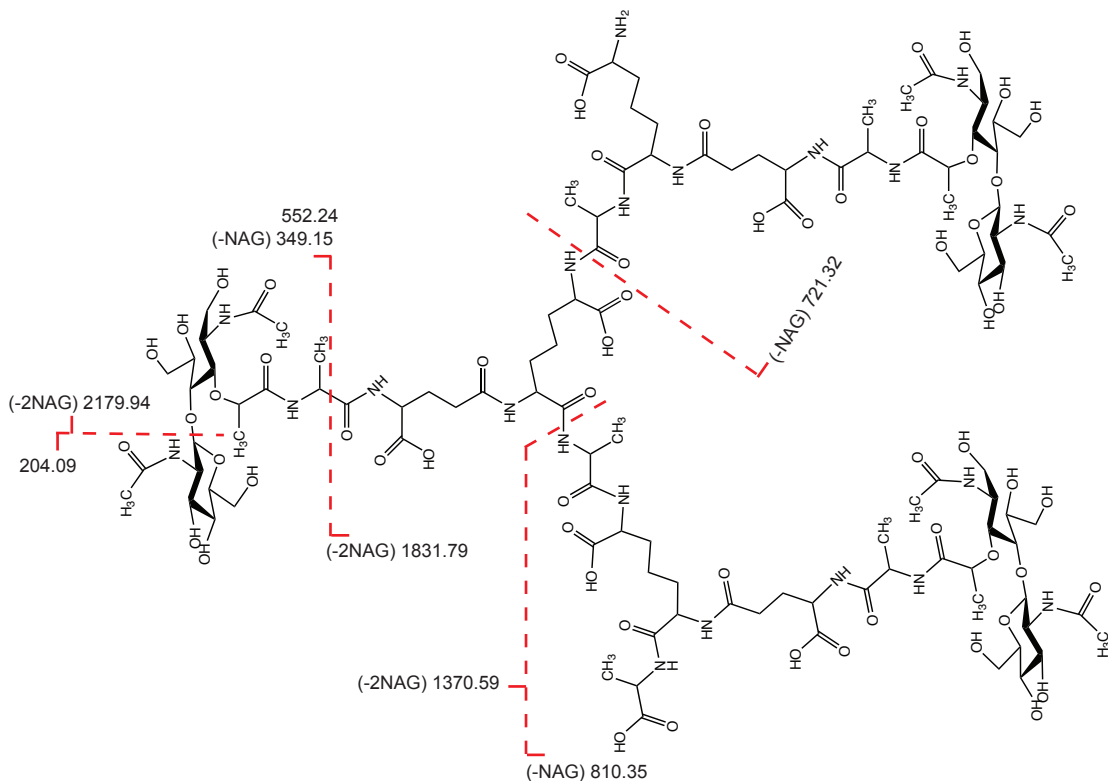

MS/MS - 930.4017 (+2) *m/z*

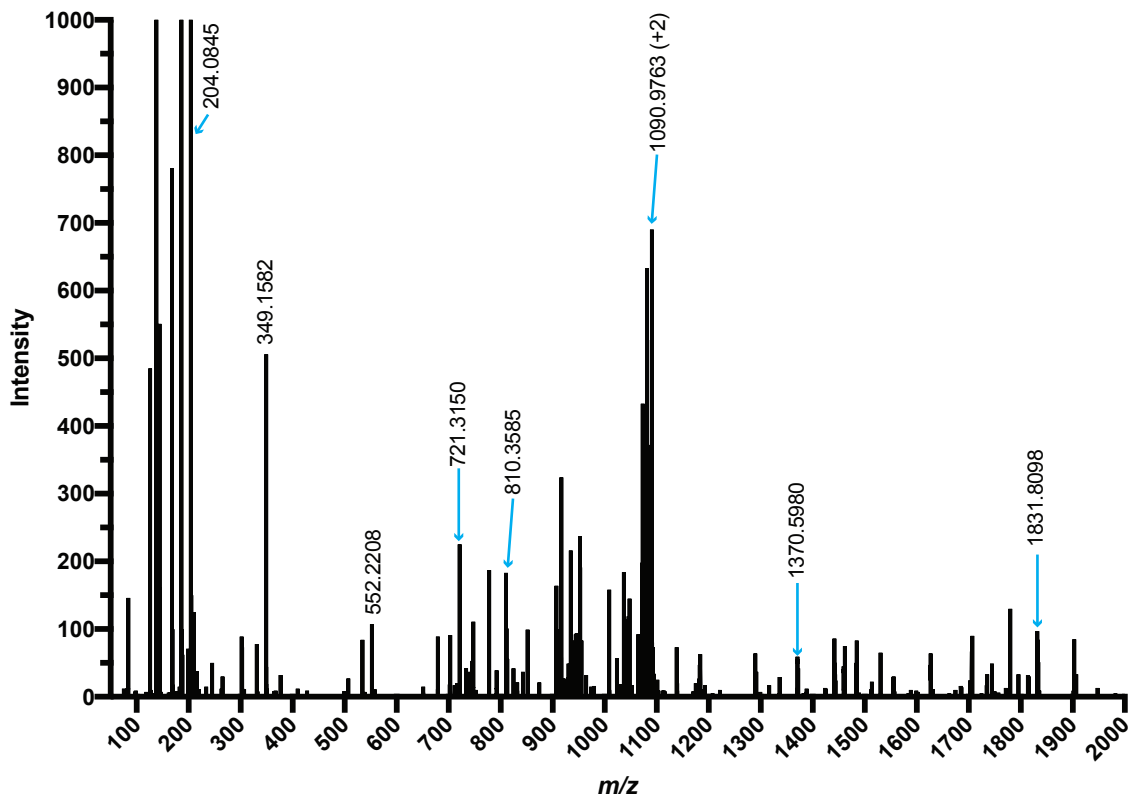

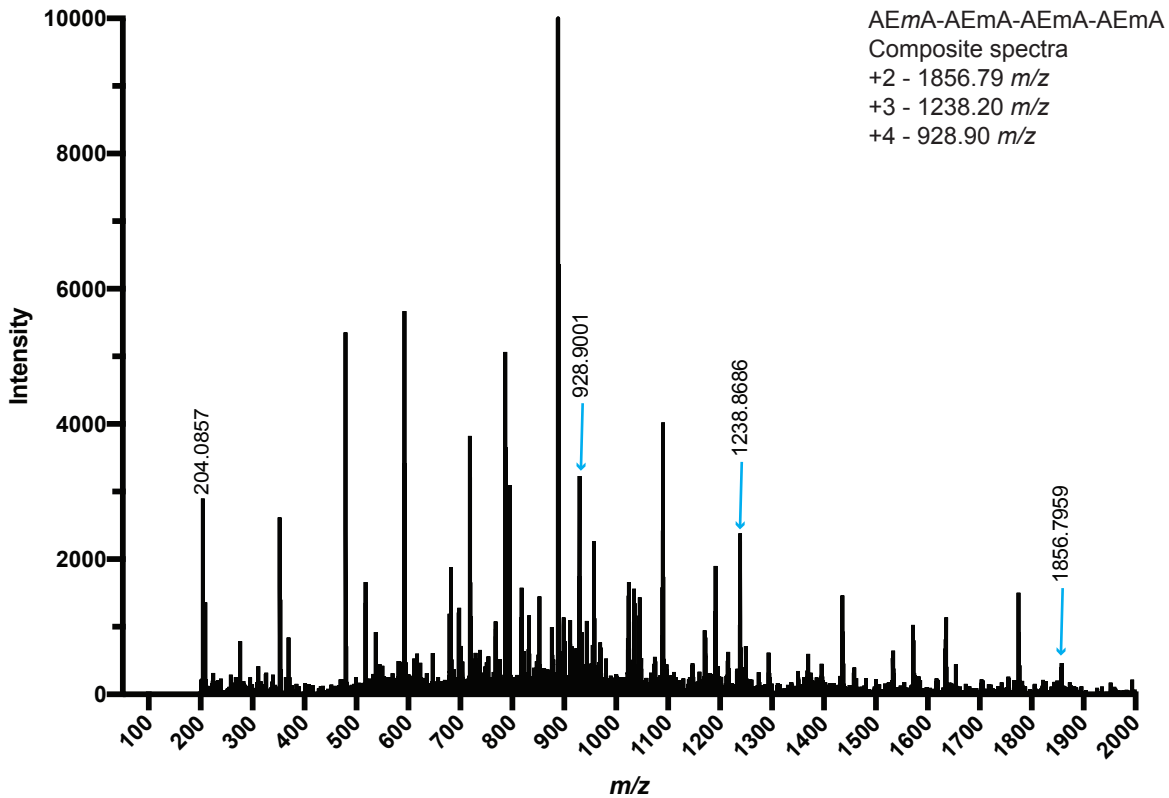

AEmA-AEmA-AEmA-AEmA

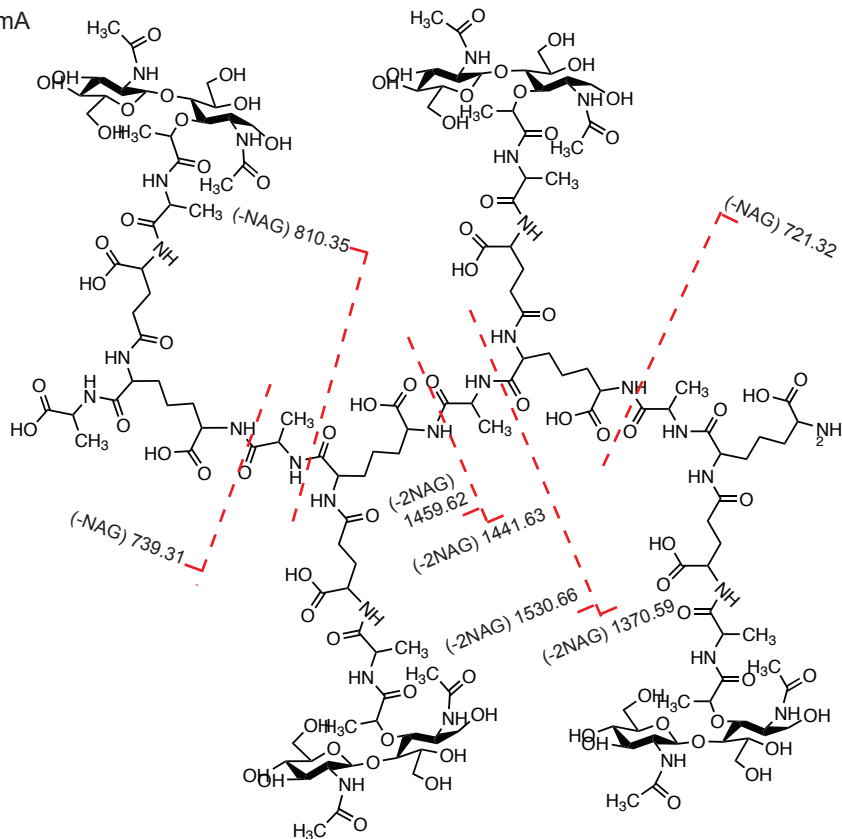

MS/MS - 1238.2002 (+3) m/z

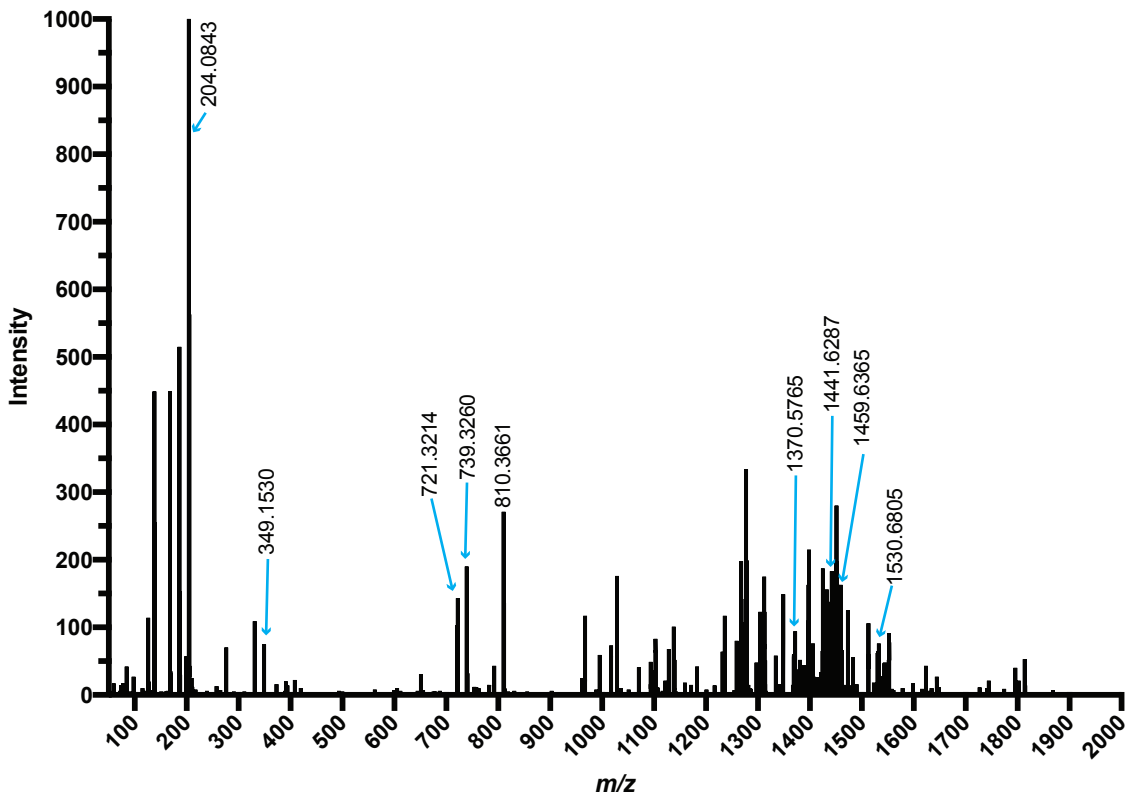

Supplement: supp_RA119.010505_154989_2_supp_434518_q1jcds.pdf [file supp_RA119.010505_154989_2_supp_434518_q1jcds.pdf]
