# Supplementary material
Source: PubMed Central journal article supplement (PMC6956531)
Supplement: supp_RA119.010505_154989_2_supp_434701_q1ksd9.pdf [file supp_RA119.010505_154989_2_supp_434701_q1ksd9.pdf]

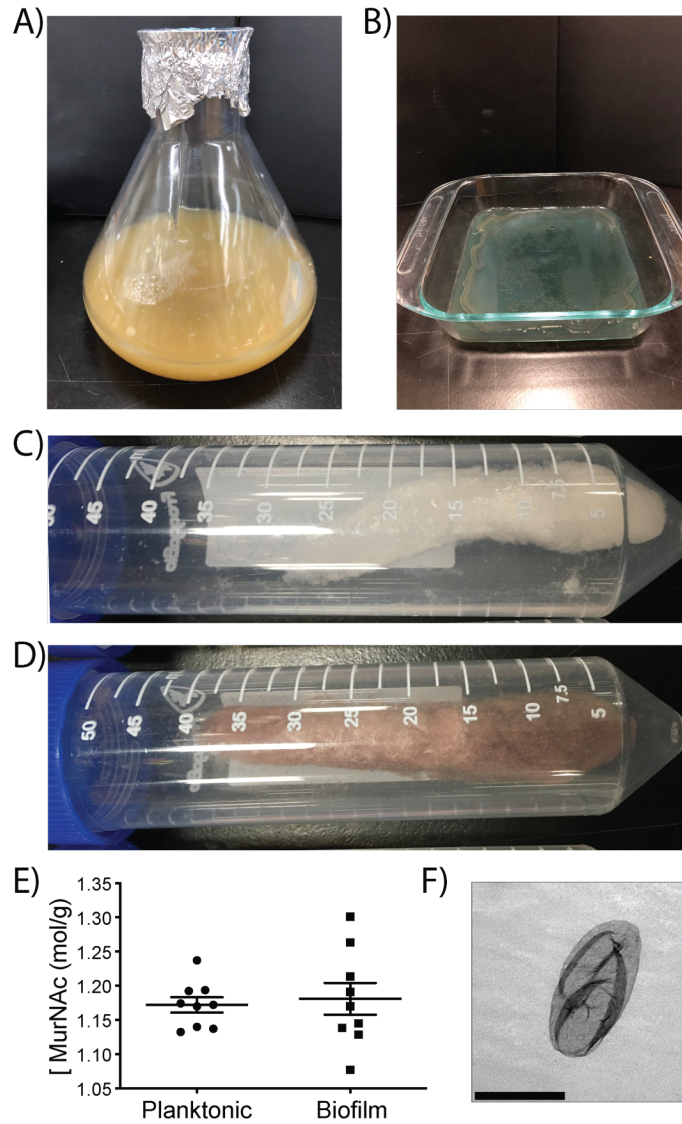

**Figure S1.** Growth conditions represent distinct growth morphologies. A) Liquid culture representing 96 h planktonic-growth condition B) Agar culture representing the 96-h biofilm-growth condition. C) Lyophilized peptidoglycan sacculi purified from planktonic-culture. D) Lyophilized peptidoglycan sacculi purified from biofilm-culture. E) Quantification of the NAM concentration in biofilm- or planktonic-derived peptidoglycan samples. F) Transmission electron micrograph of a single PAO1 sacculi isolated from a biofilm culture (scale = 2  $\mu\text{m}$ ).
